# Supplementary material for: Sequence-dependent quenching of fluorescein fluorescence on single-stranded and double-stranded DNA
Source: RSC Adv. 2022 Feb 16;12(9):5629–37. doi: 10.1039/d2ra00534d (PMC8982050; doi:10.1039/d2ra00534d)
Supplement: RA-012-D2RA00534D-s001 [file RA-012-D2RA00534D-s001.xlsx]

## Sheet: ssDNA_forward
	Normalized fluorescein intensity	SEM
TTTTT	1	0.0806107
TTTCC	0.94179	0.0330495
TTTTC	0.928825	0.0486234
TATTT	0.920232	0.0241361
TTTAA	0.910181	0.0265674
TTCTT	0.900785	0.0285647
TTTCT	0.897193	0.0230118
TTCAT	0.893897	0.0468829
TTATT	0.891589	0.0295639
TCTTC	0.889261	0.0281982
CTTAA	0.887165	0.0315689
TCTAT	0.885478	0.0969897
CTTTC	0.881288	0.0393504
AATTC	0.877301	0.0749939
ACTCT	0.874306	0.0489218
CTTCT	0.864763	0.0372619
TTAAT	0.863131	0.0182723
TTTAC	0.86261	0.015458
ATACA	0.861919	0.045033
CTATT	0.861886	0.0309619
TTCCC	0.860917	0.0143405
TTCAC	0.855026	0.0283229
TACCC	0.852519	0.04889
ATTCA	0.850431	0.0292991
AAATA	0.850421	0.0175346
TCTTA	0.849087	0.0317926
TATTA	0.847304	0.0335943
ATTTA	0.847028	0.0195991
ATCCA	0.845968	0.0287405
TTTCG	0.842052	0.0324651
TCCGT	0.84164	0.0375688
TTTAT	0.841384	0.0227139
TAATC	0.840896	0.0602718
ATTTT	0.839907	0.0349386
TTCAA	0.839218	0.0334184
CATTT	0.83849	0.0368076
TTTCA	0.838414	0.020176
ATATT	0.835179	0.0267109
TAACA	0.834838	0.0363681
TCTCC	0.833774	0.0256497
ACACT	0.83131	0.0256059
ATCAT	0.830484	0.021821
TATCT	0.830133	0.0240847
TTACA	0.829751	0.0165829
ATCTC	0.829162	0.027598
ATTTG	0.828164	0.0267691
ATCAA	0.827038	0.0167386
TATCC	0.82682	0.0301985
AAAAT	0.826798	0.0353666
TCCTT	0.826724	0.0387684
CTTTT	0.82544	0.0169082
TCCAT	0.825206	0.0383138
TTTTA	0.824898	0.0222311
TCCTC	0.824118	0.0160969
TTTGT	0.823789	0.0254572
ATTCT	0.821571	0.0268938
TACCT	0.820884	0.0221214
TCACA	0.82075	0.0178946
AAATT	0.819586	0.0386564
GCTTT	0.819094	0.0768349
TTCTC	0.818582	0.0362693
ATTAA	0.818102	0.019722
ATCCC	0.817874	0.0474725
TAAAG	0.817172	0.0410949
ATTGT	0.816933	0.0353717
TACTA	0.815838	0.0402205
CTTTA	0.814097	0.0173498
TATAT	0.813563	0.0452263
ATTTC	0.81317	0.0287906
AAACT	0.81294	0.0486977
ATAAC	0.812764	0.0201768
ACTTT	0.811722	0.0221508
ATACG	0.8117	0.0402381
TCTCA	0.811583	0.0401842
TTCGC	0.811522	0.029451
CTACT	0.811388	0.0235581
TTCTA	0.810842	0.0211183
ATATA	0.810789	0.0321458
TACGT	0.810271	0.0271576
TCCAA	0.810158	0.0359591
TATAA	0.810011	0.0281421
CATAC	0.809987	0.0145337
ACTTA	0.809934	0.0375594
CTTAT	0.809312	0.0280548
TCGTT	0.807838	0.0356902
TCTGT	0.807544	0.0228208
ATTAT	0.807382	0.0156267
CATAA	0.807067	0.0321669
AAACC	0.807005	0.0265421
TACAA	0.806721	0.0249202
TCCTG	0.806589	0.031551
ACTAG	0.805736	0.0333358
TAATT	0.804974	0.0317207
CCCCT	0.804413	0.0327824
TTATC	0.80139	0.0273251
TTAGT	0.801354	0.0168719
TACCA	0.799902	0.0288423
TATTC	0.79944	0.0184231
TATCG	0.799417	0.0272259
TTCTG	0.799205	0.0529944
TACTT	0.799037	0.0313787
CCTTC	0.79831	0.0384222
TATAC	0.798022	0.0162016
CTGTT	0.797874	0.0165104
CCTAT	0.797571	0.0181235
CTCAT	0.79745	0.0238085
AACCC	0.797205	0.0179567
CTAAA	0.796829	0.0412253
ATATG	0.796634	0.0366757
TTCGT	0.796581	0.0230088
AATTT	0.795893	0.0111394
TGTAT	0.794973	0.0167004
TCAAA	0.794417	0.0311729
TTATA	0.794382	0.0213305
CTCTT	0.793551	0.00922833
TTTGC	0.79322	0.0435337
AAGTT	0.79306	0.0339318
TCATT	0.79273	0.0393806
CCTTT	0.79243	0.015639
CCAAC	0.792414	0.0373192
GTAAA	0.792012	0.0722889
CTCAC	0.792004	0.04174
CTTCA	0.791854	0.0194626
ATATC	0.789682	0.0180396
CTGCC	0.789657	0.0662672
AATTG	0.789636	0.0505233
ATTAC	0.789525	0.0163134
CATCT	0.78823	0.0326636
ACCCA	0.787095	0.0273189
ATTGA	0.786798	0.0352845
CAGTT	0.786332	0.0349542
CAACT	0.786328	0.0395773
CTCCT	0.785712	0.0352661
CAATA	0.785706	0.0185808
TCTAA	0.78566	0.013955
TTGTG	0.785576	0.037617
CCCTT	0.784764	0.0199002
GTATT	0.784352	0.0421136
TAACC	0.783205	0.0313769
CTAAC	0.782302	0.0128352
TTACC	0.782118	0.0205215
TTCCT	0.78173	0.041247
AATCT	0.781558	0.0118241
CCTCC	0.781386	0.030701
TTCCA	0.7805	0.0177973
CTTAC	0.779295	0.0208576
TCGCT	0.778798	0.0158796
ATCGT	0.778058	0.0348247
TCACT	0.776885	0.0241342
TGCTT	0.776134	0.0382177
TCTTT	0.775547	0.0232383
TAATG	0.775442	0.0294333
ACATT	0.775234	0.0328301
CAGTC	0.77507	0.0350864
AACAT	0.774635	0.0649532
ATTCC	0.774497	0.0228769
TAACT	0.773993	0.0275545
GTACT	0.773947	0.021112
CAACG	0.773154	0.0249091
CATTA	0.773044	0.0261682
TTTTG	0.772626	0.0130606
CTCCA	0.772565	0.0181115
AATTA	0.771795	0.0192146
TCTTG	0.771559	0.0295383
AGTCC	0.77144	0.047252
ATCTG	0.771435	0.0363796
CTTCC	0.771111	0.0158877
CTCTC	0.770973	0.0195487
CAAGT	0.770928	0.0189713
CTCAA	0.770835	0.0284002
CTTTG	0.770679	0.0134894
ATACC	0.770508	0.0258135
TTTAG	0.77036	0.0186091
AATCA	0.769894	0.0236979
ATCGC	0.769848	0.0231145
TAACG	0.76981	0.0178589
CTACC	0.769448	0.026404
CACTT	0.769355	0.0168145
TACTC	0.76794	0.0252089
TCACC	0.767806	0.0231998
TAAAT	0.767229	0.0361713
CTCCC	0.766976	0.0327298
ATAGC	0.766948	0.0312907
ACTAT	0.766508	0.0268308
CATCC	0.766108	0.0218542
GTCTT	0.764755	0.0334248
AATCC	0.763917	0.0405808
ACACC	0.763909	0.0180749
ATAAA	0.763677	0.0122645
ATGAC	0.763673	0.0209309
CCCTC	0.763444	0.0282058
AGATT	0.76341	0.0271395
ACTTC	0.763309	0.0221801
CCTCT	0.76319	0.0258044
TACAG	0.763169	0.0391292
TAGAC	0.76223	0.0204163
TCAAG	0.762053	0.0294066
ACTAC	0.761477	0.0298408
AACCA	0.761433	0.0291079
TATGA	0.761237	0.0211221
TCATC	0.76096	0.0163093
AAACG	0.760414	0.0256708
AGTTA	0.760363	0.0219629
TCAAC	0.760292	0.0345466
CAATC	0.760172	0.0222058
ATCCT	0.760148	0.0267353
AGCAT	0.760131	0.0335498
ATGCT	0.760037	0.0281568
CTCGT	0.759272	0.0239502
ATGAT	0.759012	0.0309232
ATAGA	0.758673	0.0300606
CTATC	0.75836	0.0270256
AACAC	0.758146	0.02309
CTTGT	0.757929	0.019077
CAAAT	0.757757	0.0360313
AAGTA	0.756863	0.0196215
ACCTA	0.756807	0.0326883
TCAAT	0.756322	0.0244602
ACGGT	0.756295	0.023309
CCGGC	0.75589	0.0340521
CTAAT	0.755759	0.0115143
CTATG	0.755391	0.0178272
TCCGC	0.754754	0.0141547
TCCCT	0.754579	0.0384177
TTAAC	0.753997	0.0207954
ACAGC	0.753699	0.0602294
TACGC	0.75311	0.0234596
TCCCA	0.753085	0.0171761
TATCA	0.753002	0.0334598
AGTTT	0.752991	0.0319504
TACAC	0.752913	0.0177667
TTATG	0.752514	0.0323567
ACGTC	0.752387	0.0353762
TAATA	0.752224	0.028802
CATCA	0.751799	0.0253168
TGTTT	0.751795	0.0366918
TCTAG	0.751422	0.0152747
TCCCG	0.751087	0.0267419
TAGTC	0.751011	0.0558456
ATCGA	0.750654	0.0132913
CGCTC	0.750547	0.0342286
TTGCT	0.750474	0.0223236
GACTT	0.750463	0.0350465
CCCCC	0.750448	0.0149873
TCTAC	0.749792	0.0105571
CACCT	0.749556	0.0182916
ATTCG	0.749232	0.0321223
TTAAA	0.748491	0.0120517
TGTTC	0.748358	0.0231523
GTTCT	0.748284	0.0235566
GATTT	0.747776	0.0168275
TACAT	0.747669	0.023288
TAGCG	0.747634	0.0259845
AACTA	0.747524	0.0161561
AATAA	0.747458	0.0153935
ATCTA	0.747435	0.0348452
ACTCC	0.747175	0.0266713
TCAGA	0.746976	0.0266403
ACCTT	0.746447	0.0189501
GCATA	0.745902	0.0240177
AATAC	0.745244	0.0341615
ATCGG	0.7452	0.0364341
TTTGG	0.745155	0.0146537
AAAAC	0.74511	0.0369378
CACTC	0.744312	0.0131038
CTCTA	0.744199	0.0255822
TCCTA	0.743616	0.0191175
TTAGA	0.742984	0.0243859
ACATG	0.742971	0.0257969
CTACG	0.74291	0.029963
ATTAG	0.742857	0.0344434
CAGCC	0.742403	0.0280732
TAAGT	0.742302	0.0194049
AAGAT	0.74214	0.0296453
CTCGC	0.741933	0.0429859
CATGT	0.74192	0.0197866
CTGCT	0.741544	0.0450059
AGATC	0.741409	0.0294782
ATCAG	0.740986	0.0257089
CCTCA	0.740956	0.0241293
CACTG	0.740923	0.0438419
TCGCC	0.740731	0.021241
CTGAC	0.74048	0.0374918
TTGTT	0.740425	0.0195136
TACGA	0.740378	0.0197116
TCTCT	0.740112	0.0193138
ACAAC	0.739919	0.0114509
ATAGT	0.739046	0.0214224
AACTG	0.73825	0.0244357
CCGAC	0.737765	0.029983
TAGCA	0.737551	0.0275616
CAACA	0.737411	0.0130047
TCGGT	0.737254	0.038337
ATACT	0.736682	0.0354209
AGCAC	0.736554	0.0120586
AAATG	0.735918	0.0323903
TAGTT	0.735486	0.0304883
TAGCT	0.735477	0.0107627
CTATA	0.735283	0.0207359
CTGTA	0.73523	0.0156591
CTTGA	0.735097	0.0252555
GCATT	0.734748	0.0265519
GTTAT	0.734681	0.0390244
CCTTA	0.734591	0.0337289
ATCTT	0.733977	0.0271263
ACCTG	0.733852	0.0178157
GCTAT	0.733529	0.0381857
TCATA	0.733257	0.0245718
CTCAG	0.732715	0.0178677
CTTAG	0.732715	0.0206829
CACAG	0.732402	0.0346067
CTTGG	0.732358	0.0390737
TTGCA	0.732113	0.0504149
AGACT	0.731979	0.02335
AAGGT	0.731785	0.0411237
TTGTC	0.73097	0.0342077
TTACG	0.730812	0.0187928
CAGAT	0.730761	0.0141992
ACCGA	0.730534	0.0253707
CAAAA	0.730384	0.0379003
CGATT	0.730062	0.0213602
CCGTT	0.730009	0.0279169
AATAG	0.729591	0.0402298
TAGTG	0.729386	0.0360498
AAAAG	0.729344	0.0245083
TAGTA	0.729336	0.0156887
AGAAA	0.729268	0.0198096
ACTAA	0.729214	0.0187817
CACTA	0.729091	0.0144651
ACCGT	0.728877	0.0317958
AACCT	0.728638	0.019848
ACATC	0.728463	0.0266698
TGTAG	0.72844	0.0851169
CCAAT	0.728393	0.0315622
TCCCC	0.728179	0.0362264
CATTC	0.72786	0.0209862
CCTGT	0.727763	0.0201329
CACAC	0.727714	0.0134457
AAGCT	0.727559	0.0262948
ACCGC	0.727085	0.0239332
ACATA	0.726653	0.0278332
TTCGA	0.726143	0.014578
CTGCG	0.726131	0.0481332
TGGTT	0.725852	0.0451492
AGAAC	0.72555	0.0213039
CTTGC	0.725465	0.0204121
TAAAC	0.725397	0.0247943
TCCAC	0.725131	0.0300595
TAAGA	0.724377	0.0270707
GTAAT	0.724373	0.0326711
AAGAC	0.724174	0.0140921
CCCAA	0.724129	0.0344541
TATTG	0.723969	0.0282089
AGCCT	0.72331	0.0369904
TGTCA	0.722666	0.0168666
ACTGA	0.721914	0.0298675
TTGAA	0.721766	0.0231425
TCTGC	0.721526	0.00990812
ACTCG	0.721398	0.0299516
TCGAC	0.720954	0.0266139
ATGTC	0.720553	0.0242873
GTCCC	0.72047	0.0268572
CCTGC	0.720401	0.0182062
CCATC	0.720236	0.0223873
CCTAC	0.720182	0.0180313
ATGCC	0.719763	0.0295081
TGTCT	0.719637	0.0206964
CCATG	0.719553	0.0245898
TGCAA	0.71948	0.0271711
ACGAC	0.719168	0.0181695
GACAT	0.718593	0.0203416
ACCAT	0.718474	0.023091
AACCG	0.718245	0.0202275
CAAGG	0.718164	0.0284093
GCCAA	0.718021	0.0207548
AACGC	0.717411	0.028451
GTTCG	0.716941	0.00752052
GTCAT	0.716466	0.0150184
ACCAC	0.71634	0.0185388
TATGT	0.716323	0.0314198
AGCTT	0.716309	0.0139027
AACTT	0.71595	0.0189485
CGCTT	0.715887	0.0188776
TCGAT	0.715879	0.024588
ACAAT	0.715809	0.022549
AAGTC	0.715397	0.0237791
TGTTA	0.71534	0.0182568
GATCT	0.715333	0.0225859
ACCGG	0.71515	0.0290835
TGCCA	0.715086	0.0325808
CGTGA	0.714696	0.0629141
CCATA	0.714635	0.0240575
CATAT	0.71462	0.0259673
AACGA	0.714514	0.03742
TGTCC	0.714387	0.0393579
TCCGA	0.714377	0.0357081
CTACA	0.714276	0.0165217
GAATT	0.714269	0.0316633
CTCGA	0.714131	0.0198669
ACGTT	0.713512	0.0148117
CGTAC	0.713467	0.051758
ACCAA	0.713092	0.024376
CATTG	0.712944	0.0263776
CGCAT	0.712764	0.0281027
AATAT	0.712472	0.0223711
CTAAG	0.712185	0.0214139
TGTTG	0.712164	0.0184647
TTAAG	0.71194	0.0223546
TGCTC	0.711826	0.0178437
TATGC	0.711629	0.0160821
GTATA	0.71102	0.0201802
AGATA	0.710951	0.0166559
AACAG	0.71065	0.0294274
CACCC	0.710558	0.0205568
CAGTA	0.710393	0.0247217
AAACA	0.710324	0.0327842
ATCCG	0.710233	0.0184507
TCGCA	0.710149	0.0147348
CATAG	0.710087	0.012033
AATGA	0.709929	0.0107341
TGAAA	0.709806	0.0325913
ATAAT	0.709802	0.0253322
CCCAT	0.709634	0.0309817
TAGAG	0.709367	0.0261421
TGACA	0.709298	0.0181076
TGTCG	0.709042	0.0203593
CTAGA	0.70899	0.028856
AACGT	0.708935	0.0258538
GATTA	0.708676	0.0346013
CGTTT	0.708404	0.0180097
TGTAA	0.708353	0.00977209
CTGCA	0.708178	0.0176836
CTCGG	0.707848	0.0290747
TTCGG	0.707805	0.0227921
GTTAA	0.707543	0.0226774
TAAGC	0.707297	0.0140385
AACAA	0.707142	0.0256942
CCGCT	0.706913	0.0596168
ACCCC	0.706841	0.0195487
TCAGT	0.706725	0.0201041
TCCAG	0.706695	0.0272737
GTTCA	0.706118	0.0348558
AGACC	0.705922	0.030675
TCGTC	0.70583	0.016631
ACTCA	0.705553	0.0198477
AAGCG	0.705472	0.0285759
CCACA	0.705166	0.0287957
CGTCC	0.704384	0.0391784
GATGC	0.704314	0.0256044
TATGG	0.704195	0.0145037
TCACG	0.704026	0.0291287
CGTAG	0.703929	0.0359212
GTTTT	0.703562	0.0213386
GCTTA	0.703009	0.0222204
AGCTC	0.70274	0.0251094
GACCT	0.702531	0.0149229
AATGT	0.701998	0.0256128
AGCGA	0.701788	0.0284215
ACGTA	0.701575	0.0220137
TTGCG	0.701426	0.0123901
CCTTG	0.701408	0.0253699
CTAGT	0.701374	0.00908265
AAAGG	0.701033	0.0225976
AACTC	0.700637	0.0299751
CCGAT	0.700168	0.0145247
CCACG	0.699163	0.0278258
AGTAC	0.699124	0.0187745
ACTGT	0.698775	0.0116892
CCAAA	0.698499	0.0139534
CAAGA	0.698472	0.0270731
TTGAT	0.698398	0.0303294
AGGCA	0.698035	0.0188671
GCTCT	0.697431	0.030359
TTACT	0.696956	0.0170896
CCTCG	0.696752	0.0142723
CGTTA	0.696644	0.020974
CATGG	0.696585	0.0223265
GTGTT	0.696363	0.0122261
ATGTA	0.696331	0.0291339
TAAAA	0.696099	0.0245316
TAGAA	0.696064	0.0351584
TGCGA	0.695889	0.0317233
TCTCG	0.695868	0.0140226
AGTAT	0.695792	0.0219026
CCACC	0.695549	0.0101689
CCACT	0.695435	0.0265917
TCAGC	0.69533	0.0220852
GTCGT	0.695203	0.0237866
ATAAG	0.694828	0.0393964
TTCCG	0.694562	0.0302787
CCAGT	0.694253	0.0179888
GCGCT	0.694227	0.0378603
AAAGA	0.694209	0.0171484
CCTAA	0.693935	0.0248114
GCACT	0.693864	0.0425137
CGACC	0.693713	0.0323071
AGTAG	0.69368	0.0239334
GTTTA	0.693483	0.0163798
AAGCA	0.693428	0.0181934
TCTGA	0.693369	0.0198585
TTGTA	0.693341	0.0131158
ACGTG	0.693209	0.025227
ACAAA	0.693157	0.00974169
TTTGA	0.692909	0.0315127
CGATC	0.692851	0.0340118
TAGCC	0.692781	0.0229431
CTTCG	0.692771	0.0176617
AAAGC	0.692239	0.0145724
AGGTG	0.691868	0.0282338
CAGCT	0.691765	0.0302215
CAGCA	0.691169	0.0111392
ATGGT	0.6907	0.0280795
AACGG	0.690621	0.0289416
TGCAC	0.690118	0.0224542
CAAAC	0.690057	0.038589
AGCGC	0.689551	0.0125183
GACTA	0.689447	0.0113951
AATCG	0.689254	0.0310429
CAACC	0.689235	0.0212901
TATAG	0.688837	0.0275726
TACCG	0.688835	0.0383694
GTGCT	0.688557	0.0450617
TACTG	0.688476	0.0181643
CCCGA	0.688411	0.0245947
AGCCA	0.688039	0.0114723
CTCTG	0.687996	0.017476
CGCGT	0.687831	0.0173905
AAGGC	0.687515	0.0300837
TGTGT	0.687425	0.0204748
TAGGT	0.687321	0.0227695
ACGAA	0.687304	0.0281767
CATGA	0.686239	0.0405975
CAAGC	0.686082	0.0218664
TTCAG	0.686043	0.0192191
CAATG	0.685993	0.0237907
AGTAA	0.685914	0.0137187
CAGAG	0.685853	0.0291185
TTGGT	0.685502	0.00813551
TGCTA	0.685384	0.032388
CAATT	0.685323	0.0221308
CACAT	0.685224	0.029498
ACAGA	0.685091	0.0306749
ACGAT	0.685029	0.0307431
GTTTG	0.684846	0.0347989
TGACC	0.684615	0.0206406
ACGGA	0.684208	0.0190366
CCCTG	0.684159	0.0526785
GAAAA	0.684057	0.0345158
CCCTA	0.683469	0.0198053
ATGCA	0.683303	0.0109853
AGACG	0.683283	0.0272734
CCATT	0.682658	0.0115979
ATCAC	0.682305	0.0161622
CTGTC	0.681878	0.0210406
TTGAC	0.68169	0.0171296
ACCTC	0.681507	0.0209144
CCAGC	0.681474	0.0377549
CACAA	0.680822	0.0195515
TGATA	0.680784	0.0252983
ACAGT	0.68036	0.0185371
AGATG	0.680262	0.0348599
TCGTA	0.680162	0.0252708
GTCAC	0.679896	0.0106214
AAATC	0.679785	0.0237031
TCCGG	0.679645	0.0120453
TTAGC	0.67957	0.0213233
GCAAT	0.678902	0.0271699
CGAAG	0.678756	0.0271745
ATGTT	0.678523	0.0207779
GCTCC	0.678449	0.013393
ACCCG	0.678419	0.0163786
CGCCT	0.678417	0.0218305
TCGAA	0.678346	0.023942
CGTTC	0.67819	0.0116105
TGCGG	0.678015	0.0263172
CTGTG	0.677995	0.027758
TAGAT	0.677515	0.0305921
GACCA	0.677503	0.0128912
TGCAT	0.677168	0.0153497
CACCG	0.676745	0.0153141
AGGCT	0.676633	0.0191012
GATTC	0.676565	0.0199527
AGCGT	0.676549	0.0313917
AGTTC	0.676476	0.0532356
ATTGC	0.675864	0.00834844
TGCGC	0.675578	0.0261785
AGTTG	0.675014	0.0441119
ACGCT	0.674974	0.0217377
ATGCG	0.674602	0.0192304
GCACC	0.674491	0.0271877
CCAAG	0.674399	0.0248795
GTCTC	0.674326	0.0296158
AGCTG	0.674206	0.0255637
AGTGC	0.674098	0.0304854
TGACT	0.673981	0.0142188
CCGCA	0.673537	0.0100684
GTTAG	0.67331	0.0287179
CACGA	0.673247	0.031946
GTTGC	0.672616	0.0361369
ACGCG	0.672583	0.0288496
AGTCT	0.672433	0.0180113
CCTAG	0.672401	0.014505
CATCG	0.672393	0.0250691
GTTAC	0.672386	0.0269352
TGAAC	0.672143	0.0332083
TGCCT	0.671655	0.031248
AAAAA	0.671641	0.0200808
AGAAT	0.671484	0.0508356
GTCCA	0.670996	0.0179046
TTGAG	0.670714	0.0370387
CGCTA	0.670649	0.0286972
GTCTA	0.67062	0.0205346
CCGGT	0.670335	0.0288119
GTTGT	0.670313	0.0317347
TGATT	0.669973	0.0220482
TGATC	0.669782	0.0411708
ACTTG	0.6697	0.0160298
AGCAG	0.669525	0.0250449
AGCTA	0.669347	0.0174155
GTACC	0.669037	0.0194672
GCCTT	0.668415	0.0253441
GGTTT	0.668128	0.0280068
TACGG	0.667862	0.0332954
ACACG	0.667762	0.015258
CCAGG	0.667567	0.018345
TGTAC	0.667505	0.0153143
GCTGT	0.666986	0.0200653
ATGAG	0.666835	0.0263442
GCTAA	0.666786	0.043631
AATGC	0.666631	0.0199446
GTATG	0.66652	0.0141329
ACGGC	0.66643	0.0168441
CCGTA	0.666329	0.0183596
TGGCA	0.666312	0.0229658
GTAAC	0.666102	0.0341611
AGGAT	0.666031	0.0150582
ACACA	0.665785	0.017249
GATAC	0.665763	0.0308552
ATGTG	0.665544	0.0165715
GTTGA	0.665236	0.0306107
TCATG	0.665063	0.0167064
GTATC	0.664805	0.0217083
CGAAC	0.664677	0.0179858
CAAAG	0.663609	0.0268843
CCCGT	0.663271	0.0243051
AGGTC	0.66326	0.0303598
TGTGA	0.663023	0.0194165
CACGT	0.662473	0.0183109
GCCTA	0.662329	0.0375432
AGGCC	0.661944	0.0343215
AGAGA	0.661792	0.0230846
CAGTG	0.661104	0.0196671
TGGCC	0.661071	0.0106043
ATTGG	0.660993	0.0373389
CACGC	0.660163	0.0130223
TGAGA	0.660095	0.0265046
TGGTC	0.659888	0.0172025
GAACA	0.659531	0.0350901
GCCAC	0.659487	0.0243182
TCGCG	0.659321	0.0329661
GACGT	0.659267	0.0320388
AAGAG	0.65877	0.0420521
CGCCC	0.658417	0.0134504
GATCC	0.658237	0.0259075
AGCCG	0.6579	0.0240159
CCTGA	0.657668	0.0154615
GCTCA	0.657216	0.0231404
GGCTA	0.657	0.0411884
GTCCT	0.656917	0.00940112
GCAAC	0.656641	0.0116853
ACGCC	0.656467	0.0175174
TGAAT	0.656429	0.0128067
GTTCC	0.655832	0.0214474
GTAGC	0.655235	0.0158786
TAGGC	0.655112	0.030498
CTGAA	0.65486	0.00986159
GGATC	0.654835	0.0501744
CGTTG	0.654809	0.0349895
AGAAG	0.654798	0.0141634
AGGTA	0.654715	0.0207858
CCCCA	0.654647	0.0239314
GCTGC	0.654343	0.0379624
CTGAT	0.653366	0.0244532
GCACA	0.652564	0.0288497
AGTGT	0.652301	0.0214233
GTGAT	0.651922	0.014728
TCGAG	0.651502	0.0246939
CCCCG	0.651469	0.0185561
ACTGC	0.650681	0.0248242
GAAGC	0.650667	0.0263346
AGGAA	0.650415	0.0263269
ATGGC	0.650206	0.0269788
TGGTA	0.650079	0.0457674
CGTCT	0.649902	0.027278
GAGCG	0.649424	0.0267779
AGTCA	0.649354	0.0186171
TTGCC	0.648686	0.0278557
GTACA	0.648499	0.0318122
GCGTC	0.648395	0.0212789
TGCCC	0.648303	0.027668
TGGCT	0.647894	0.0180542
AAAGT	0.647873	0.0157947
GTAGT	0.647739	0.0310866
AGAGT	0.647374	0.00772885
ATGAA	0.647282	0.0192839
GAATC	0.647182	0.0324093
ACGAG	0.647114	0.0199627
TGTGC	0.647018	0.0308807
CTCCG	0.646247	0.0109155
AGAGC	0.646169	0.0131974
CAGCG	0.646136	0.0150038
CAGAC	0.645998	0.0213524
CCGTG	0.645642	0.0258906
AGGTT	0.645505	0.0238077
CATGC	0.644888	0.0122637
CTAGC	0.644809	0.0506422
CCGAG	0.644712	0.0239957
GCGTT	0.644472	0.0250538
ACCCT	0.643804	0.0217723
TGCGT	0.64367	0.0228727
AGGAC	0.643521	0.0172044
CCCAC	0.643202	0.0210226
CCAGA	0.64307	0.020147
GACTC	0.643043	0.0230914
ACTGG	0.642628	0.0187275
GAATA	0.642391	0.0201347
AAGGA	0.642244	0.0251618
CGATA	0.641838	0.0185749
GATTG	0.641822	0.0194034
GTGAC	0.641728	0.0317634
CGTCA	0.641635	0.0127926
GCGCC	0.641427	0.0222343
TCGTG	0.641303	0.0280434
GATGT	0.640925	0.0333789
GCAGT	0.640774	0.020883
GTCAA	0.640305	0.0176603
TTAGG	0.63989	0.0165761
TGATG	0.639101	0.0474306
CGACT	0.638659	0.0225142
AGCAA	0.638647	0.0151508
GTGCC	0.63799	0.0237232
GATAG	0.637904	0.0350431
GTCTG	0.637749	0.0367792
ATGGG	0.637348	0.0354339
GTGAA	0.637089	0.026006
GCCTC	0.636773	0.014477
CTAGG	0.63676	0.0168836
ACAGG	0.636647	0.0244881
GCTTC	0.635733	0.0146722
GAGCT	0.63534	0.0269247
CGAAA	0.634351	0.0290427
GCTGG	0.634336	0.0316915
AGCGG	0.634174	0.022451
TCAGG	0.633815	0.0436064
CCCAG	0.633659	0.0232353
GAAGT	0.633587	0.0202072
TCTGG	0.63341	0.0244152
GCACG	0.633393	0.0261813
GTCAG	0.63288	0.016855
GACCG	0.632475	0.0299792
CCGAA	0.632343	0.0274734
CAGAA	0.631739	0.0240968
CAGGT	0.631623	0.0471872
CGGCT	0.63058	0.027206
AAGTG	0.63003	0.013468
GATAA	0.629852	0.0221513
GGTAT	0.629319	0.0189986
TTGGC	0.628839	0.0281942
CTGAG	0.628392	0.0268885
TGCAG	0.628148	0.0232944
GAACT	0.628026	0.0142393
TCGGA	0.627859	0.0179256
GATAT	0.627558	0.0244401
GATCA	0.627478	0.0174511
TGGAT	0.627451	0.0192215
CGGTT	0.627123	0.023706
ACGCA	0.627075	0.0186088
GCGAC	0.627058	0.00780433
TTGGA	0.626355	0.0199936
CACCA	0.625895	0.0269204
CGCCA	0.625606	0.0241235
GTGGC	0.625565	0.0206044
CCGCG	0.625484	0.0324473
GAACG	0.624911	0.0141186
CCGTC	0.624668	0.0211305
CGCAA	0.624502	0.0181939
CAGGC	0.62436	0.019768
GCTAC	0.623121	0.0145706
GAGCA	0.62292	0.0196062
GTGCA	0.622515	0.0149654
GCCAT	0.621523	0.0316124
GTTTC	0.621415	0.0145641
CGAGG	0.621209	0.0114114
CGAGT	0.621076	0.0173441
AATGG	0.620688	0.0277095
GTGGT	0.619504	0.0229034
GTAGG	0.619475	0.0218204
GACAC	0.619203	0.0135471
CCCGC	0.619094	0.0284834
TTGGG	0.618373	0.0172368
AGTCG	0.618339	0.022693
CGTGC	0.618201	0.0145526
GCTCG	0.617986	0.011636
GGAAC	0.617914	0.0155252
GGTAC	0.617789	0.0117185
GGCAT	0.617485	0.0401793
GAAAC	0.616492	0.0153411
TGCCG	0.616316	0.0183249
AGTGG	0.616196	0.0259469
AGCCC	0.615406	0.034235
GCAGC	0.61525	0.0218015
GGTTA	0.615022	0.0350465
CGACA	0.614738	0.0154425
GTAGA	0.614512	0.0209894
GCCCT	0.614055	0.0261027
CGAAT	0.613569	0.0225227
GCAGA	0.613423	0.0110748
GGTTG	0.613177	0.025367
CGGTA	0.61306	0.0266964
CCCGG	0.612088	0.0117869
GCTAG	0.612012	0.0301976
CGTAA	0.611764	0.014453
AAGCC	0.610123	0.0254437
GCGTG	0.61009	0.0228916
GGTCC	0.609587	0.0130192
GACGC	0.609474	0.0423795
CGGCC	0.608695	0.0286252
GATCG	0.60858	0.0242522
AGGCG	0.607911	0.0200948
ACCAG	0.607901	0.0166252
AGGGG	0.607727	0.0100826
TGAGT	0.607628	0.0185207
TAGGG	0.606688	0.0128401
CGGTC	0.606629	0.0116341
GGATT	0.605431	0.0209568
GACTG	0.604884	0.0257118
GCAAG	0.604655	0.0235237
TGAGC	0.604628	0.0332015
CGTCG	0.604379	0.0156956
TGGGC	0.604246	0.0314777
CGTGT	0.60336	0.0202218
CGTAT	0.603281	0.0216632
TCGGC	0.603046	0.0153232
TGCTG	0.602485	0.026512
GAAAT	0.602076	0.0274275
GCCGC	0.601801	0.0253673
GGGTT	0.601496	0.0333678
CGCAG	0.600959	0.0116062
AAGAA	0.600659	0.021155
GTGTC	0.600349	0.0250774
GCGGT	0.600116	0.0162823
TGGAA	0.599749	0.00909412
CCGCC	0.599734	0.0244121
CGAGC	0.59939	0.0134015
GTAAG	0.599288	0.0204693
TGGAG	0.59903	0.021602
CCTGG	0.598869	0.0161478
GTGGA	0.598556	0.0225561
GCCGT	0.598412	0.0201807
AGACA	0.598054	0.0297642
GCGTA	0.59751	0.0333516
ACAAG	0.597045	0.0247061
CGAGA	0.596963	0.0244018
GGCCG	0.596279	0.0303114
CGCTG	0.595796	0.0277036
AGAGG	0.595582	0.037576
GACAG	0.593875	0.0146675
TGTGG	0.593579	0.0245576
GCCTG	0.593391	0.0379072
TGACG	0.593288	0.0169702
GGCCT	0.592775	0.0140735
CTGGT	0.592694	0.0157518
GCCGA	0.592507	0.0250322
CTGGG	0.592194	0.0350864
CGCGC	0.59213	0.0313736
TGAAG	0.591134	0.0135857
CGACG	0.591129	0.0152728
GAACC	0.59053	0.0215356
TAAGG	0.589939	0.0138873
GAGTG	0.589051	0.0193251
GCCAG	0.588865	0.0110107
GACAA	0.587702	0.0205347
CGGAG	0.587465	0.0349964
AGGGT	0.586473	0.0365185
CCGGA	0.586375	0.0189098
GGAGT	0.586243	0.0552568
ACGGG	0.585706	0.022092
CAGGG	0.583968	0.0151952
CGGAA	0.583306	0.0306399
GCAAA	0.583247	0.0271697
CGGCA	0.582812	0.0218243
GGTTC	0.58275	0.0284609
GGCGT	0.582727	0.012276
GGCAC	0.582416	0.00940054
TGGCG	0.581961	0.0707792
GGAGC	0.581648	0.0287004
GGACC	0.581342	0.0106871
GGTGT	0.581252	0.00579793
GACGG	0.580739	0.00844114
GCATG	0.580395	0.0264609
GCGAA	0.580194	0.00829427
GCCCC	0.579893	0.0110956
GGCCA	0.579619	0.0156749
GCGAG	0.578703	0.0302164
GCGCA	0.578189	0.0390902
TAGGA	0.576488	0.0146812
GCAGG	0.576393	0.0216296
CGCGA	0.576211	0.00732418
TGGTG	0.57614	0.0103895
GCCGG	0.576055	0.0246028
GAGTT	0.576008	0.0206317
CGTGG	0.574628	0.0209851
CGCGG	0.57377	0.0239655
GGCTT	0.573416	0.0255959
GAAAG	0.573135	0.0132232
GCATC	0.572631	0.0137298
ATGGA	0.572446	0.0222606
CACGG	0.571834	0.0217128
GTCGC	0.571033	0.0181834
AGGAG	0.570948	0.00972298
TGGAC	0.570497	0.00817296
CGGTG	0.570475	0.00869459
GTGAG	0.569875	0.0136123
AGTGA	0.56935	0.0166598
GGATG	0.569197	0.0223521
GGTCA	0.568912	0.0148777
GCCCG	0.568816	0.0246889
GCTGA	0.568363	0.0211559
CGATG	0.56812	0.0135502
GAGAT	0.567762	0.0442948
GGCTC	0.5673	0.0132624
GTGTA	0.567245	0.0301194
TGAGG	0.567092	0.0201185
GACCC	0.566838	0.0135736
AGGGC	0.566418	0.0274382
GAGCC	0.565733	0.0256638
GGACA	0.565311	0.0198788
GTACG	0.564423	0.0133417
GGTAA	0.563961	0.0226512
CGCAC	0.563323	0.0335764
GGTGA	0.563263	0.0261162
TCGGG	0.562684	0.0215146
GGTCT	0.56236	0.0170178
GATGA	0.562058	0.0179016
GCTTG	0.561589	0.0240745
GTCCG	0.560249	0.026657
CAGGA	0.560003	0.0231174
GGATA	0.558667	0.00931656
CGGAC	0.558602	0.0112755
GTCGG	0.558203	0.0224772
GTTGG	0.557719	0.0214418
GCGAT	0.557285	0.0191779
GAGAA	0.556925	0.0164667
GTGCG	0.55611	0.0117565
TGGGT	0.556057	0.0189935
GGCAG	0.554807	0.023219
AAGGG	0.553791	0.0282572
CGCCG	0.552702	0.0242099
GAGTC	0.551296	0.0342701
GCGGC	0.551181	0.0113865
GGACT	0.549539	0.0113875
CTGGC	0.549431	0.015746
GGCAA	0.548735	0.012524
GGGAC	0.548417	0.0295277
CGGAT	0.547498	0.0153239
ATAGG	0.546307	0.0080812
GGAGA	0.544131	0.0173385
GGTAG	0.544047	0.00861197
CGGGG	0.544024	0.0234798
TGGGA	0.543191	0.0110027
GTGTG	0.54267	0.00399927
CGGGC	0.542648	0.0202137
GAAGG	0.542298	0.0121765
GAATG	0.542251	0.0139282
GAGAG	0.540051	0.0171587
GGCGA	0.539584	0.0212215
GATGG	0.539228	0.0222562
CCGGG	0.537507	0.0165831
GACGA	0.537204	0.0230764
GGAAG	0.535399	0.0179935
CTGGA	0.53475	0.00745139
GAGAC	0.534424	0.0118716
GGGTC	0.533469	0.0222955
GGTCG	0.532633	0.0134141
GCGGA	0.531494	0.00915837
GAGGC	0.530801	0.0162675
GTGGG	0.52989	0.0439683
GAGGG	0.528978	0.0299371
GCCCA	0.528773	0.0189118
GGGCC	0.528567	0.0185893
GGGAA	0.528147	0.0191239
GGGCT	0.527205	0.0186234
GTCGA	0.524785	0.0280423
GGCGC	0.523806	0.0258946
GGGAT	0.522199	0.014383
GGTGC	0.522087	0.0243769
CGGGA	0.518828	0.00745761
GGGAG	0.517385	0.00865711
GAGTA	0.516832	0.0118953
GAAGA	0.515284	0.0169149
AGGGA	0.513411	0.0222694
GGGCG	0.511399	0.0234042
GGGTG	0.509356	0.0119046
TGGGG	0.507808	0.013784
GGGGT	0.505842	0.0189987
GAGGT	0.505708	0.00882888
GGACG	0.505219	0.00866914
GCGCG	0.504273	0.0242385
GGAGG	0.501332	0.0202698
GGGCA	0.497769	0.0111525
CGGGT	0.496535	0.00877178
CGGCG	0.495207	0.00922224
GGAAA	0.493438	0.024264
GGAAT	0.490981	0.025273
GAGGA	0.486607	0.0141272
GGTGG	0.483156	0.0286524
GGCTG	0.480686	0.0235572
GGGGA	0.480048	0.0205945
GGCGG	0.475927	0.0133012
GGCCC	0.474891	0.0311352
GGGTA	0.465257	0.0137417
GGGGG	0.420251	0.0185587
GGGGC	0.414061	0.0120253
GCGGG	0.412124	0.00532544

## Sheet: ssDNA_reverse
	Normalized fluorescein intensity	SEM
CTTTC	1	0.146306
TTATA	0.998695	0.0763548
TTTTT	0.998653	0.0464248
TTATC	0.994662	0.0513256
TTTCG	0.98817	0.094031
TTTAC	0.988144	0.040976
TATCC	0.976963	0.10695
TATTA	0.972056	0.0478126
TTCAC	0.969979	0.0580082
TCTGT	0.968517	0.0844756
TCCCT	0.96656	0.0257427
TACTT	0.966363	0.0624977
TTCTT	0.964975	0.0383989
TACAA	0.962993	0.0503268
TTTGC	0.962278	0.0326486
TTTTC	0.955938	0.0398951
CTGAT	0.955588	0.102082
ATCCC	0.95551	0.0412625
TTATT	0.955308	0.0491886
CCACT	0.954072	0.0952036
ATCTC	0.948438	0.0541572
TCCTC	0.947663	0.0393064
TAACC	0.9463	0.0397158
ATACA	0.946169	0.0403599
TAATT	0.946053	0.0536231
TTAGC	0.945712	0.0461779
TACCT	0.945337	0.0416757
TTTCC	0.945184	0.0251646
TTTAT	0.943226	0.0347273
TATTT	0.940972	0.0258328
TTACC	0.940935	0.0293357
CACTC	0.939485	0.0312749
TATCT	0.938317	0.0360632
ATCTT	0.935685	0.0273304
ATGAT	0.93505	0.123086
CTATA	0.934839	0.0640039
ATTCA	0.934326	0.0405745
ACCTA	0.933918	0.0564186
CTCTC	0.933023	0.0864041
TTCCG	0.93147	0.0469966
TATAA	0.930471	0.0357823
TATCG	0.928109	0.029724
TATTC	0.927558	0.0305862
TTCAT	0.926555	0.0237733
ACAGT	0.923033	0.132694
TCGCT	0.922146	0.0459918
TTTCA	0.921477	0.0181837
CTGCA	0.921404	0.0785307
TCTCC	0.921204	0.0130387
CCCTT	0.919607	0.0564878
CCTCC	0.919129	0.035138
CTCCA	0.918293	0.0527446
TCTAG	0.91812	0.0291242
TAAGC	0.918077	0.0539209
TCACC	0.917772	0.0246276
TCGAC	0.916239	0.0458899
TCTAT	0.915844	0.0333488
ATAGC	0.915668	0.0302049
TCCCA	0.915657	0.0410226
TGCTC	0.914077	0.0395868
TTAGT	0.914019	0.0276259
TTCCA	0.913922	0.0521407
ACTAA	0.9137	0.101717
TCCTT	0.91302	0.018049
TTGCA	0.912559	0.0418297
GTAAC	0.912338	0.165339
TAATA	0.911397	0.0400977
TCTCT	0.91038	0.0280298
TATCA	0.910348	0.0221513
GAACA	0.908604	0.0568315
TCATG	0.907204	0.0465309
TCCAT	0.906966	0.0481076
TAACA	0.906762	0.0296155
TCGCA	0.906627	0.0597079
TCATT	0.906539	0.036201
TACGC	0.905667	0.0345401
TCGCC	0.905613	0.0265441
TCCAA	0.9052	0.0287668
ATTAA	0.905029	0.0340695
TTCTC	0.904245	0.0302039
TAAAC	0.903972	0.0577567
TACTC	0.903664	0.0347228
CATCC	0.903269	0.0513643
TTACA	0.901974	0.0237289
TCATA	0.901912	0.0282336
TACCC	0.901818	0.0306637
CCAGA	0.900984	0.14073
TTACG	0.900983	0.0430279
ACTCC	0.900852	0.0377302
ATATG	0.900428	0.0460124
GTACT	0.899721	0.0415573
ATTAC	0.899423	0.0378011
TCCGC	0.898212	0.0302194
ATATA	0.898184	0.0280712
CATTC	0.897815	0.0404687
ATTGT	0.897445	0.041307
ACCCA	0.89651	0.050512
TCCCG	0.896206	0.0230398
TACGT	0.895756	0.0328263
TTAAT	0.895403	0.0286773
ACACC	0.894315	0.0515942
ATTTA	0.894304	0.037986
TTTAG	0.894245	0.0165664
GACCT	0.893464	0.0283941
CACCG	0.89323	0.0533503
TCGAA	0.892989	0.0397202
TTCAA	0.892964	0.0334848
TTATG	0.892553	0.0361137
CCTTC	0.892317	0.0457967
TACCG	0.892266	0.038102
TTCGA	0.892016	0.047325
TCAAT	0.891761	0.0459015
TACTA	0.891579	0.0275387
TCAGC	0.891494	0.0448558
ACACT	0.88994	0.0469873
TATAC	0.889925	0.0249846
TACGA	0.889597	0.0422697
TTGAT	0.889326	0.0858501
TAAGT	0.888484	0.0155768
TCACA	0.888218	0.0391312
TTTCT	0.888201	0.0195582
CTCAT	0.887364	0.0511847
CGCTC	0.887125	0.0452669
TCCAC	0.886383	0.0348818
CACTT	0.886297	0.049093
CACAT	0.886065	0.0659179
ATCAC	0.885918	0.0470271
CTTCT	0.885192	0.0426776
TCACG	0.885096	0.0284435
TGTTG	0.884901	0.0627883
TTAAG	0.884743	0.0134978
TTTAA	0.88434	0.0510323
AACAA	0.883494	0.113546
TAGCA	0.883065	0.0179251
TCTTA	0.8826	0.0250367
ATTCC	0.882527	0.0282373
TCTAC	0.882039	0.0343995
CTGCC	0.881018	0.0397426
TCAAC	0.88072	0.0250201
TTTGT	0.879417	0.033069
TATTG	0.878895	0.0384453
GTCTT	0.87869	0.0460552
CTTTT	0.878263	0.0404746
CTAGC	0.87668	0.0394224
CCTAC	0.875669	0.0296296
TTCCC	0.875597	0.0318229
TTCCT	0.875425	0.0191878
ATTAT	0.875189	0.0181391
CTCAC	0.875055	0.030156
CATTT	0.874957	0.0239752
TGTTC	0.8747	0.0426133
TTAAC	0.874663	0.0187379
CCTTT	0.874371	0.0378112
TTACT	0.873955	0.0240685
CCCTC	0.873294	0.0221133
CCCCT	0.872768	0.0247382
CCGTC	0.872413	0.09199
TACAT	0.872014	0.0393813
TAATC	0.87186	0.0230196
TTGAC	0.87172	0.0429748
TATAT	0.871635	0.0247936
ACTCT	0.870854	0.0311119
CTTAA	0.870646	0.0330603
TTCAG	0.870633	0.0429789
ACTTT	0.870611	0.0220634
ACCGC	0.869457	0.0356267
TCCCC	0.869212	0.0295047
TGCCT	0.869102	0.0277357
TTCGC	0.868998	0.035057
TACAG	0.868951	0.0905758
CATCT	0.868906	0.0198929
ACCAC	0.868267	0.0195535
TCCTG	0.867729	0.0257933
CCAAT	0.867445	0.0485842
TCAGA	0.86744	0.0203779
ATACG	0.867215	0.0359365
TACAC	0.867183	0.0295705
ACTAC	0.867041	0.0217314
TGTCC	0.867034	0.017193
TTCTG	0.86699	0.0329056
ATCTA	0.866934	0.03165
TAAGA	0.86673	0.0546108
TCCTA	0.866531	0.024041
TCTTG	0.866422	0.0206053
TATGC	0.865516	0.0208479
CCTGC	0.865323	0.0533919
ATATC	0.864915	0.0214661
TCTTT	0.864166	0.0299752
CCTAT	0.864129	0.0230072
CTATT	0.86395	0.0303298
TTCTA	0.863679	0.0231615
GTCCC	0.863655	0.0314401
TCGTC	0.863347	0.0264987
CTGTC	0.863304	0.038185
CTTGC	0.863215	0.0486378
TGTGC	0.862853	0.0594127
ACCCC	0.862708	0.02061
ACCAA	0.86169	0.0266487
CTTCA	0.860866	0.0228506
TCGTA	0.860783	0.04885
TCACT	0.860706	0.0185872
GTTGT	0.860547	0.0509163
TACGG	0.860442	0.0187471
ATCAA	0.860389	0.0256702
GTCTC	0.86013	0.038549
GTATT	0.860101	0.0237017
ACTTA	0.859967	0.0350127
CCTGT	0.858825	0.0333808
TATAG	0.858805	0.0521247
TCGTT	0.858639	0.0204731
TAATG	0.858091	0.0505432
TTTTG	0.857968	0.0406971
ATAAG	0.857782	0.0332976
ATCGC	0.856348	0.0301678
AAGTA	0.85615	0.0362067
CTACC	0.855498	0.0243607
TGCCA	0.855104	0.0302144
ACATA	0.854695	0.0371125
GACAT	0.854677	0.0339339
TGCTT	0.854654	0.014668
CTTAG	0.854322	0.0220647
CTCGC	0.854159	0.0105348
CAATC	0.853825	0.0316979
GCTTT	0.853664	0.0307196
TAGTA	0.853337	0.026507
CCTCT	0.852487	0.0454052
TTTTA	0.852382	0.0190174
ATACT	0.851975	0.0536287
CTTGA	0.851452	0.0398419
CCACA	0.850937	0.0525335
ACTTG	0.850909	0.0347813
CCGAC	0.850825	0.0172502
CTCGT	0.850247	0.0157709
TCTCA	0.850142	0.0251362
CCCAG	0.849226	0.0330683
CATTA	0.849145	0.0482908
TTGCC	0.848345	0.0580063
TTAGA	0.848306	0.0209938
TACCA	0.848277	0.0223005
CTCTG	0.848073	0.0437776
CCCAT	0.847179	0.0541009
CAAAT	0.846885	0.0432602
GTCCA	0.84683	0.0346213
TGAGC	0.846304	0.0348457
TAGCC	0.846219	0.024137
TAACG	0.846002	0.0311051
GAATT	0.845766	0.0212625
ATGTT	0.845201	0.02904
ATCAG	0.844819	0.0332721
ACGGC	0.844636	0.0638743
TTGTT	0.844419	0.0287842
CCATC	0.844265	0.028592
CTTAT	0.844217	0.0607221
TATGT	0.844115	0.018511
TATGA	0.844027	0.023324
CCCTA	0.843754	0.0407572
TTCGT	0.843661	0.033284
GTCAT	0.843485	0.0144272
TAAAT	0.843422	0.0408395
CAAAG	0.843038	0.0682924
CCTGA	0.843013	0.0317713
CTACA	0.842399	0.0467217
GCCTT	0.842349	0.0392807
ATCCA	0.842175	0.0232558
ATATT	0.842171	0.0408414
CCCCA	0.84202	0.0351575
CTCTA	0.841161	0.020567
GACTT	0.840843	0.0434176
ATAAT	0.840834	0.0278069
ACTGA	0.840591	0.033054
ATCGT	0.840366	0.024349
TCGCG	0.840299	0.0184991
CTGAA	0.840268	0.0403905
TAACT	0.840222	0.0310225
ATCCT	0.839879	0.0357515
TAAAG	0.839638	0.0319988
AACCG	0.839635	0.042401
AGTTT	0.839368	0.0191037
GTTTC	0.838896	0.0183613
TAGAC	0.838863	0.0183273
CTCCC	0.838789	0.0285253
TGCAC	0.838612	0.0279251
AGATC	0.838602	0.0362055
ATTAG	0.838533	0.0229724
TTGAA	0.838353	0.019123
TTGCT	0.837834	0.0223981
ATGTC	0.837391	0.028472
GTCAC	0.837323	0.0299423
ATGTA	0.837178	0.0206402
CTTAC	0.836823	0.0313777
CACTG	0.836593	0.0237884
ATCGA	0.836574	0.020142
CCAGC	0.836027	0.0194062
ACTAG	0.836011	0.0441433
ATTCG	0.835732	0.0346665
CTGCG	0.835594	0.0268864
ACACA	0.835509	0.0399272
GACCA	0.835384	0.0283667
CCGCA	0.835226	0.0350804
AATTG	0.835188	0.0258205
ACGTC	0.835011	0.0357493
TGACC	0.834635	0.0262356
ATCAT	0.834579	0.0296872
CCATT	0.83443	0.0260856
ACTAT	0.834058	0.0145419
CATAA	0.83405	0.02951
ACCGT	0.833962	0.0274227
AGAGC	0.833662	0.0650754
CATCG	0.833659	0.0382314
CTACT	0.83359	0.0152922
CTCTT	0.833003	0.0136798
ATCCG	0.832937	0.0361987
CTATC	0.832829	0.0175928
CCACG	0.832647	0.0608176
TGATC	0.832266	0.0288057
AGAAC	0.832155	0.0300752
TCTGG	0.832154	0.0337243
CACAC	0.832116	0.0270565
TCTTC	0.832114	0.0324485
AAGCA	0.832014	0.0208916
ATGAC	0.831972	0.0233721
ATGAA	0.831881	0.0188316
TCCAG	0.831824	0.019326
CACCC	0.831806	0.0234006
CCCCC	0.831788	0.0230577
CCGAT	0.831701	0.0336478
CAGAT	0.831488	0.0232846
ATTGA	0.831246	0.0264871
CTGTA	0.830668	0.014417
TCTCG	0.830425	0.0349284
CTCCT	0.830231	0.0244026
TGACA	0.830193	0.0190917
TTCGG	0.830192	0.0483539
CAGTT	0.830125	0.0193419
AGAAT	0.829953	0.0484146
ATTTC	0.829936	0.0321114
CAAGT	0.829718	0.0322698
GTATA	0.829444	0.0322285
CAGAG	0.829192	0.0422396
CAGTA	0.828613	0.0404144
GATTT	0.827911	0.0202333
TGTTT	0.827869	0.0282851
CTCCG	0.827852	0.0454651
ATACC	0.827068	0.0243167
AGCAA	0.826769	0.020206
CTACG	0.826594	0.0473132
ACCCT	0.826378	0.0406353
ACCTT	0.826354	0.0282745
CCCGA	0.826206	0.0361633
ACTTC	0.825986	0.0278802
TCTGC	0.825919	0.0194281
CATCA	0.825899	0.0313448
ACGAA	0.825892	0.0434033
TCCGT	0.825536	0.0218551
CGTCC	0.825472	0.0406356
CAACT	0.825471	0.0294375
CCATA	0.825393	0.0304177
CTGAC	0.825249	0.0208011
CAATG	0.825013	0.0260517
TAGAT	0.824767	0.0271017
AGTCC	0.824387	0.0276264
CGACC	0.824269	0.0219381
AACCA	0.823723	0.03349
TTAAA	0.823586	0.0237897
GACAC	0.823329	0.0274519
TCAAG	0.82305	0.0222094
CTAAC	0.822957	0.0318453
ACATC	0.82277	0.0193362
AATCA	0.822684	0.0162675
CAACC	0.82253	0.0412793
GCAGA	0.822494	0.0871761
ATTCT	0.822213	0.0215308
TACTG	0.822157	0.0219095
ACCAT	0.822082	0.0241166
CAACA	0.822059	0.0402073
TGCCC	0.821596	0.0205981
ACCCG	0.82155	0.0269441
TTGGC	0.821519	0.0351222
GAAAA	0.821369	0.0490178
TTGCG	0.821214	0.0215162
ACAAA	0.821199	0.0563319
TAGAA	0.821137	0.019908
CTCGA	0.821131	0.0309435
TTTGA	0.821068	0.0156867
CCATG	0.820862	0.0197467
TTGTC	0.820791	0.0216908
GCATT	0.820261	0.0259947
CTAAT	0.82017	0.0445785
ACGTT	0.819819	0.0526485
ATTGC	0.819732	0.0230645
GCACT	0.819351	0.0176334
TCCGA	0.818124	0.0225231
CTAAA	0.818011	0.0311006
ATAAC	0.817836	0.0218415
CGTAC	0.817623	0.0466228
CAGCC	0.817555	0.020142
TAGCT	0.817462	0.0306174
ATGCC	0.817342	0.0232248
TCGGT	0.817183	0.0282591
AATTA	0.816972	0.0236617
TCTAA	0.816955	0.0370357
CAGTC	0.8164	0.0406191
GTAGA	0.815903	0.0173756
AAGCG	0.81564	0.0444961
TCAGT	0.815283	0.0369152
GTTCC	0.815125	0.0389178
CAGCT	0.814867	0.0234517
GATTC	0.814395	0.0288711
GCCTC	0.814378	0.0228918
CACGT	0.814299	0.0503139
CCGAA	0.813825	0.0266733
CGTCT	0.81349	0.0314259
TCAAA	0.813468	0.0229444
ACATT	0.813359	0.022593
TTGTA	0.8131	0.0217841
AATGG	0.812948	0.039111
ACGCC	0.812887	0.019178
ACAAC	0.812809	0.0314204
CATAT	0.81268	0.0224621
GCCTA	0.812647	0.0238218
ACATG	0.812576	0.0171527
TCGAT	0.812004	0.021771
ATAGT	0.811483	0.0299415
ATAAA	0.81119	0.0226059
CAAGC	0.811141	0.0300845
GAACC	0.810659	0.0481656
CATTG	0.810577	0.0202789
CGCCC	0.809751	0.0254215
CTAAG	0.809623	0.0526753
GTTTT	0.809471	0.0215718
GATCT	0.809022	0.0269769
TGTCT	0.808822	0.0294619
TAGTC	0.808792	0.0257686
TTGTG	0.808507	0.0409918
CTCAG	0.808436	0.0194389
CCCGC	0.808363	0.0389883
ATTTT	0.808288	0.0163852
GATTA	0.808277	0.0302779
TCCGG	0.807995	0.0248031
GTTTA	0.807907	0.0401196
TAAGG	0.807819	0.0332356
GTCTA	0.807605	0.0499336
AAGGC	0.807553	0.0887543
GCTCA	0.807135	0.0264048
TAGCG	0.807123	0.0214457
GTAAA	0.80712	0.0245911
TAGAG	0.807075	0.0266786
AATCC	0.806938	0.0432984
TCGAG	0.806923	0.0199517
AACCT	0.80644	0.049336
CTTGT	0.806139	0.0211614
GATCC	0.80602	0.0336363
CCGTT	0.805929	0.0279011
GCATA	0.805877	0.021213
AGAAA	0.805696	0.0284309
AACTA	0.805492	0.0288932
CACGC	0.805179	0.0343745
CCTCA	0.804435	0.0270341
CGACT	0.804254	0.0364461
CTTCC	0.804251	0.0258055
TGACT	0.804158	0.017634
GCAAC	0.804074	0.0632936
TGCAA	0.804005	0.036863
ATTTG	0.80393	0.0140694
GCTTC	0.803869	0.0175437
CCACC	0.803851	0.0231579
TGCAT	0.803798	0.0255385
GTATG	0.803736	0.0308544
GCTCT	0.803722	0.0234118
CTTTG	0.803197	0.0223078
CCTAA	0.803096	0.0280686
CTGTG	0.802584	0.0414522
TGGAA	0.802418	0.0438771
TGTAC	0.80234	0.0247896
TTGAG	0.802273	0.018484
TAAAA	0.801802	0.0230465
CTCAA	0.801752	0.0271306
TTAGG	0.801511	0.0221507
AATTC	0.801408	0.0242869
ATAGA	0.801401	0.017091
CACTA	0.801391	0.0237596
CAGGC	0.801192	0.031396
GTAAT	0.800421	0.0216292
CGTTT	0.800243	0.0206065
ACAGC	0.800186	0.0239313
GTCCT	0.800077	0.0227224
CTAGA	0.799694	0.0311081
AGCAG	0.799671	0.065006
GTTCT	0.799633	0.0197469
TGAAT	0.799605	0.0182338
AACTG	0.799436	0.0324134
CAGAA	0.799349	0.019334
ACGCT	0.799028	0.0266122
AGAAG	0.7987	0.0237474
AACAC	0.798501	0.0218273
GCTCC	0.798216	0.0257983
CGATC	0.797827	0.0217994
GACAA	0.797782	0.0215382
CGCAC	0.797708	0.0474378
CATAG	0.797269	0.0224988
AATCG	0.797171	0.0221707
GCGTC	0.796987	0.0158842
CCTCG	0.79694	0.0278364
AGCAT	0.79691	0.0227982
TAGGC	0.796867	0.0167101
ATGTG	0.796769	0.0240708
ACCTC	0.796738	0.0277098
AAGTT	0.796603	0.0188806
CGAAT	0.796352	0.0234918
AACAT	0.796278	0.0199761
CGACA	0.796039	0.0332686
AGTCA	0.796006	0.0190514
ACCGA	0.795931	0.0161326
GTTAC	0.795816	0.0208262
AACCC	0.795426	0.0542958
CACAG	0.795387	0.042928
GAGAC	0.795354	0.0175435
GCACC	0.795053	0.0320864
GAATA	0.794884	0.0247748
AACTC	0.794829	0.0367168
TAGTG	0.794552	0.015973
ACAGA	0.794385	0.0438818
ACGAT	0.79422	0.0277674
TGCTA	0.793724	0.0171232
CGCCT	0.793481	0.0181415
CCCAA	0.793461	0.036151
AACGG	0.793424	0.0304046
ACTCG	0.793337	0.0273847
CAAAC	0.793094	0.0336021
TCTGA	0.792853	0.0155055
GACTC	0.792737	0.0223501
CGATT	0.792609	0.0188314
ATGCA	0.792549	0.0236614
CAACG	0.792365	0.0235354
TGCTG	0.792208	0.0195251
CGTTC	0.792122	0.0446325
TGCGA	0.791847	0.0223664
CTGTT	0.791803	0.0222276
CCAAG	0.791643	0.0159801
ACTGC	0.791598	0.0235988
ACAAT	0.791536	0.0167694
ACGTG	0.791319	0.0231861
AGCTC	0.791115	0.0384172
CCAAC	0.791037	0.0198356
TAGGT	0.79103	0.0295505
CTATG	0.790908	0.0140282
CGTTA	0.790853	0.0219472
GCCAC	0.790711	0.0230712
AATAG	0.790629	0.0285831
AGCCT	0.790612	0.0285876
ACGCA	0.790416	0.0211294
TGCGC	0.79033	0.0240536
GCCCT	0.790305	0.0199946
AGTAT	0.790217	0.0196829
ACCAG	0.790044	0.0361486
GTAGC	0.789945	0.0206029
GCTTA	0.789569	0.0241346
TAGTT	0.789548	0.022823
AGTGC	0.789502	0.0180195
CCGCT	0.788792	0.0253609
TCGGC	0.788663	0.0171068
CATAC	0.788507	0.0337116
ACCTG	0.788468	0.0270645
AGCCA	0.788276	0.0146622
CAATT	0.787659	0.0230813
CACCA	0.787534	0.038902
TAGGA	0.787505	0.02306
TTGGA	0.787477	0.0299528
CGAAC	0.787205	0.0250432
CAGCA	0.787105	0.0212184
AATCT	0.78669	0.0277321
CGCAA	0.786579	0.0242193
AAACA	0.786497	0.0368945
CCAAA	0.786421	0.0463838
AACGC	0.786148	0.0454671
GTTCA	0.786085	0.0245159
AACTT	0.786043	0.0241421
ACCGG	0.785766	0.0241898
TTGGT	0.785497	0.0190495
GTATC	0.785448	0.023439
TGCGG	0.785196	0.0271156
ACAAG	0.78499	0.0228621
CACAA	0.784858	0.0349267
TATGG	0.784509	0.0333024
CCCAC	0.784383	0.019888
CACGA	0.784088	0.0278804
TCGGA	0.78407	0.0248542
TCAGG	0.784	0.018493
ATCTG	0.783974	0.0339281
CTGAG	0.783836	0.0225962
AGATG	0.78361	0.0367488
GTTCG	0.783557	0.0372956
ACGCG	0.783228	0.0224545
AGCTT	0.783167	0.0313658
TGGTC	0.78273	0.0263221
AACGT	0.782711	0.0246752
GACTA	0.782703	0.0151541
AATAT	0.782568	0.0198744
CAATA	0.782507	0.0147143
TGTTA	0.782341	0.0154799
GCACA	0.782134	0.0348771
ACGTA	0.781624	0.025565
GCCAT	0.781451	0.0280672
GCTAC	0.78141	0.0246762
AGCGC	0.781342	0.0176802
TTTGG	0.781133	0.0199222
ATGCT	0.781121	0.0289511
CCAGT	0.781051	0.0224086
AGGCA	0.78095	0.0236584
AGTTG	0.780931	0.0270955
AGAGA	0.780829	0.0277893
GTCTG	0.780794	0.0183866
TGAAC	0.780655	0.0183518
GCGCT	0.780608	0.0406234
AAGAT	0.780512	0.0357976
AGATT	0.780485	0.0372432
CGATA	0.780348	0.0350455
GATGC	0.780253	0.0229929
AGCAC	0.780192	0.0297382
GATAA	0.779955	0.0316535
TGATT	0.779481	0.0181884
CCCTG	0.779099	0.0232145
GACCC	0.778682	0.0178743
TGAAA	0.778424	0.0217744
AAGCT	0.778334	0.0279297
ACACG	0.777709	0.0260101
TGACG	0.777635	0.0337683
AGCTG	0.776806	0.0611335
AGTCG	0.776707	0.0297466
ACTGT	0.776553	0.02542
GCCCC	0.776388	0.0235982
GACAG	0.776318	0.0152382
ACGGA	0.776303	0.0513691
TGTAA	0.776303	0.0185645
AAGAG	0.776243	0.0306781
CAGAC	0.776221	0.0242677
TGATA	0.776207	0.0350659
GCCGC	0.776001	0.0409758
AATAC	0.775949	0.0235946
GTCGT	0.775721	0.0270261
AAGAA	0.775394	0.0275156
CTTTA	0.775332	0.0134074
GGATT	0.775035	0.0377238
AAATA	0.77503	0.0128247
TGTCA	0.775014	0.0103257
ACAGG	0.77497	0.0341748
CGTAG	0.774782	0.0327762
AAACG	0.774638	0.023265
CATGT	0.774505	0.0281298
GAAAT	0.774329	0.014781
CCGCC	0.774145	0.0308342
GAAAC	0.773849	0.0211059
ATGAG	0.773538	0.0340296
CCTAG	0.773409	0.0216283
TAGGG	0.773249	0.021655
GATCA	0.773244	0.022796
ACGGT	0.772921	0.013166
CTTCG	0.772788	0.024567
CAGTG	0.772096	0.0305164
CTAGT	0.771971	0.0206692
CCGTA	0.771761	0.0371232
AGCCG	0.771757	0.0342118
ATAGG	0.771468	0.0252673
ATTGG	0.771442	0.0229146
ACGAC	0.771369	0.0388778
CCCGG	0.771202	0.033124
GTTAA	0.770388	0.0202969
TCATC	0.770226	0.0193419
GATCG	0.770147	0.0253064
GTTTG	0.769945	0.0221092
GCAGT	0.76982	0.0158474
AATGC	0.769535	0.0247045
GAAGC	0.769393	0.028991
GATAC	0.769033	0.0257902
AAGGA	0.768709	0.0172946
GCATC	0.768562	0.0242935
TGGCA	0.768508	0.0210752
GACGT	0.768478	0.0169706
AGACC	0.768457	0.0308993
TGCCG	0.768352	0.0256232
CTAGG	0.768296	0.0259937
ATGGG	0.768145	0.0239273
ATGGT	0.768109	0.0374756
AGATA	0.768003	0.0263069
CCTTG	0.767812	0.0311924
TGTAT	0.767556	0.0393875
CACCT	0.766208	0.0362058
CAAGG	0.765975	0.0194895
AGTAA	0.765843	0.0204078
AATTT	0.765566	0.0358505
AATGA	0.764986	0.0286582
CGAGA	0.764868	0.0110188
CGCCA	0.76467	0.0347331
GCGAC	0.764616	0.0339783
AAGAC	0.764079	0.0216801
GAGAT	0.763655	0.0250111
GTACA	0.763422	0.0217358
GTTAG	0.763358	0.0266127
AGTCT	0.763315	0.0355784
GTTGC	0.763103	0.0247171
CAAGA	0.762989	0.0197894
AAAGT	0.762933	0.0433343
TGAGT	0.76293	0.0250223
TGGCT	0.762886	0.0244324
GTCAA	0.762855	0.0229018
CCAGG	0.762729	0.0263133
GATAT	0.762711	0.0257966
ACTGG	0.762696	0.0226459
TCGTG	0.762644	0.0183566
CCTTA	0.762578	0.0235914
GACTG	0.76215	0.0199664
TGGTT	0.76121	0.0290992
TGCGT	0.761131	0.0152856
CGTGA	0.76104	0.0139469
AGTAC	0.760925	0.0238566
AATAA	0.760448	0.0240123
AGCGA	0.760432	0.0321338
GCTGC	0.760313	0.0352284
CCGCG	0.760262	0.0169366
GAATC	0.760043	0.0218648
GCTTG	0.759365	0.0330953
AGACT	0.759157	0.0318092
GCTCG	0.758826	0.0258259
TGTGG	0.758721	0.041443
CCGAG	0.758709	0.0176791
AGCTA	0.758362	0.0210906
AACGA	0.757989	0.0228651
CTGGT	0.757979	0.0222083
GTCGC	0.757734	0.0295831
CGCAT	0.757536	0.0149266
GAACT	0.757532	0.0189104
CTTGG	0.757201	0.0190025
AGTTA	0.757094	0.0218771
CGTCA	0.756616	0.0262789
GTTAT	0.756209	0.0365604
GAACG	0.756077	0.0249925
AGTGA	0.756065	0.0252749
AGCCC	0.756062	0.0236515
AGCGT	0.755745	0.0215064
AAAAA	0.755711	0.0553185
GTAGT	0.755316	0.0166965
GTGTC	0.755299	0.0315501
GAAGT	0.75526	0.0188949
CGCTT	0.754982	0.0167804
TGGCC	0.754674	0.0153207
CATGC	0.754505	0.0161012
GTGAT	0.754344	0.0405146
GCCAG	0.754124	0.0246525
CGAAA	0.75405	0.019165
CCGTG	0.753724	0.0257104
GATGA	0.753458	0.0408374
GTAAG	0.75336	0.0167563
TGATG	0.752643	0.0276503
GTGTT	0.752298	0.0154525
AGTTC	0.752266	0.0286241
AAGGT	0.751803	0.0242386
CAGCG	0.751771	0.0264049
GTACG	0.751697	0.0207515
CGAGC	0.751593	0.0175793
GTCAG	0.751473	0.0277966
GCTAA	0.751457	0.0304431
GTGCT	0.750901	0.0327771
GCATG	0.750778	0.0214034
TGGAT	0.750739	0.0164303
CCGGT	0.750097	0.0196023
CGTAA	0.749988	0.011433
GCTAT	0.749896	0.0291203
AACAG	0.749704	0.0246831
AGGCC	0.749538	0.0192618
TGAAG	0.749457	0.0192467
CCCGT	0.749409	0.014826
CTGCT	0.749081	0.0294377
CGGCC	0.748644	0.0183059
CATGA	0.748386	0.0240607
TGTAG	0.748373	0.0222414
TCGGG	0.748213	0.018893
GATTG	0.748132	0.0200641
GCTGA	0.748118	0.0220938
GCCCG	0.747032	0.0171059
GGCTA	0.746451	0.0258802
ACTCA	0.746255	0.0190637
CGCTA	0.745828	0.0300534
ACGAG	0.745731	0.0278386
GTACC	0.745718	0.0334729
CATGG	0.745115	0.0221161
AAAGC	0.744822	0.0210357
AGGTA	0.744565	0.0788047
TGGAG	0.744519	0.0211111
CGTGC	0.744118	0.034039
AGAGT	0.743991	0.0343614
AAATC	0.743878	0.0374055
TGTGA	0.743708	0.029018
TGAGA	0.74236	0.025158
GTGAC	0.741875	0.0169826
GATAG	0.741846	0.0178312
GAGCC	0.740741	0.0284324
GCCAA	0.740541	0.0203676
GACCG	0.740368	0.0286953
ATCGG	0.73993	0.0158432
AAACT	0.739575	0.0314555
AAAGG	0.739436	0.0396356
AGACA	0.739064	0.027143
GGCCA	0.738897	0.0192082
GTGCC	0.738837	0.0272412
GCGTA	0.738739	0.0277928
TGTCG	0.738462	0.0201812
AGTGT	0.736688	0.0245837
CTGGC	0.736407	0.0239758
GAAAG	0.736353	0.0263875
AAGCC	0.736293	0.0170951
GCAAT	0.735965	0.0215357
GCTGT	0.735689	0.0206772
GCCGT	0.735662	0.0167485
CAAAA	0.735531	0.018879
AATGT	0.735191	0.0200675
TGTGT	0.735039	0.0150764
GGCAA	0.735017	0.0257547
GTGCA	0.73382	0.0253158
TGGAC	0.733741	0.0290863
AGACG	0.733681	0.018452
CCCCG	0.733618	0.0370666
GTTGA	0.733234	0.0200269
CCTGG	0.733224	0.0143661
CGCTG	0.732383	0.0132995
GTCCG	0.731739	0.0153792
GCCCA	0.729091	0.0371449
GCGCG	0.729075	0.0226751
AGGAA	0.729073	0.0250255
TTGGG	0.728969	0.0273975
CGATG	0.728358	0.035058
GCCTG	0.728291	0.0260176
CGACG	0.728244	0.0225362
CCGGC	0.727993	0.0205392
GTGTA	0.727886	0.0213832
ATGCG	0.727554	0.0280158
CGTCG	0.727545	0.0238694
ATGGA	0.727124	0.0241386
GTCGG	0.727109	0.0183085
GACGA	0.726939	0.016893
GAGTA	0.726517	0.0181767
GGAAC	0.726298	0.0253271
GAGCT	0.725548	0.0230564
GCGAT	0.725543	0.0250868
GACGC	0.72518	0.024875
AAAAT	0.725111	0.0241284
GAGAA	0.724417	0.0175712
GCGCA	0.723788	0.0216369
CGAAG	0.723159	0.0150727
CTCGG	0.722954	0.0231234
AAAAC	0.722688	0.0245177
GATGT	0.722064	0.0251858
CGCGT	0.722059	0.0167567
GCGGA	0.721412	0.044868
CCGGA	0.721304	0.0211772
AGGTC	0.72125	0.0265621
GGTCC	0.720752	0.024466
CGTAT	0.720296	0.0234823
CGCCG	0.720159	0.0340242
TGGTA	0.718756	0.0243755
AAACC	0.718408	0.0185835
GGTAC	0.718055	0.0301259
GCGCC	0.717356	0.0198857
GGCCT	0.717191	0.016231
GGTTT	0.71598	0.0304089
GTGTG	0.715616	0.0271556
CTGGA	0.71545	0.0224583
CACGG	0.714798	0.0198316
CGGCT	0.714616	0.0181775
AAGTC	0.714428	0.024721
GTCGA	0.714138	0.0190328
AGTGG	0.713253	0.0314991
TGCAG	0.712854	0.0213127
GCCGA	0.711259	0.0153919
GAGCG	0.711094	0.0213451
TGGTG	0.710828	0.015952
GGCGC	0.709825	0.0404972
ACGGG	0.70885	0.0236966
CGGCA	0.708826	0.0236391
AAATG	0.708645	0.0171011
GCGTT	0.707658	0.0184206
GGAGT	0.70695	0.0209542
GCAAG	0.706919	0.0180077
GTGGT	0.706553	0.0283288
TGGGC	0.70655	0.0160782
AGAGG	0.706278	0.0136314
AAGTG	0.706128	0.0261372
AGTAG	0.705941	0.0217115
ATGGC	0.705669	0.015628
AGGCT	0.705286	0.0124679
CGCGA	0.705164	0.0288773
TGGCG	0.704514	0.0207172
AAATT	0.704047	0.015561
GCAGC	0.703986	0.0352386
AAAGA	0.703149	0.0265077
GGTAT	0.702336	0.0167354
GGATA	0.702008	0.0248407
GACGG	0.701785	0.0229708
GTAGG	0.701772	0.0293284
GTTGG	0.701315	0.0267802
GGAGA	0.701241	0.0174028
CGGGA	0.700859	0.0548388
AGGAC	0.700033	0.0317305
GAGCA	0.699529	0.0243491
CGAGT	0.699456	0.0155489
GAGTG	0.699373	0.0201071
GGATC	0.699287	0.0181236
AGGGT	0.698415	0.0121235
CAGGT	0.697972	0.0183239
GTGAA	0.696493	0.0181953
GAGTT	0.695814	0.0272554
CGGTA	0.695576	0.0213492
GGTTA	0.694471	0.0223189
GCACG	0.694437	0.0321846
GCTAG	0.693465	0.0393481
GAGGT	0.693258	0.0159271
CGCGC	0.692864	0.0157826
CGCAG	0.692192	0.0153142
CGCGG	0.691385	0.0146363
GAGTC	0.690479	0.0228648
GAATG	0.689296	0.0185653
AGGGC	0.68853	0.027497
GTGGC	0.688423	0.0172734
CTGGG	0.688269	0.0175155
GAAGG	0.688188	0.0220661
GGCTC	0.687617	0.0206911
CGTGG	0.68709	0.0110972
CGTGT	0.687007	0.0166229
GGTCT	0.68561	0.0179808
GCGTG	0.685563	0.0160746
CGTTG	0.685136	0.0211178
GGCAC	0.685006	0.0169917
AGGAT	0.684891	0.0284072
GAGAG	0.684796	0.0182
TGGGT	0.684075	0.0509263
GGACG	0.684038	0.0404623
GGAAT	0.683664	0.0186267
GGGAT	0.683294	0.0441444
GGATG	0.682181	0.0210351
GAAGA	0.681834	0.0263724
GGACC	0.681625	0.0289226
GCAAA	0.681461	0.0307596
GGAGG	0.681376	0.0299177
AAGGG	0.680709	0.0234482
AGCGG	0.680595	0.0222093
GCTGG	0.680486	0.0214637
GTGGA	0.679831	0.0178327
AGGTT	0.679727	0.0262821
CAGGA	0.679627	0.0167787
GGACA	0.67909	0.0249182
CGGAA	0.678707	0.0225937
GGCCC	0.678653	0.0299085
AGGGA	0.677716	0.0237891
CGGAT	0.677641	0.0236408
GCGAA	0.677614	0.0249817
TGAGG	0.676577	0.0180453
CGGAC	0.676491	0.019248
CGGAG	0.675854	0.0188669
GTGCG	0.675191	0.0229726
AAAAG	0.67507	0.0234249
GGTCA	0.674032	0.0219231
GGTGA	0.67387	0.0303632
GGTGC	0.673478	0.0258822
CAGGG	0.672351	0.0214286
CGGTT	0.6709	0.0215988
GGACT	0.669904	0.0251862
GCCGG	0.669034	0.0258266
CCGGG	0.668707	0.0349616
GATGG	0.668682	0.0326459
AGGTG	0.668245	0.0300208
GGCAT	0.668102	0.0312761
GGAGC	0.666949	0.0189537
GGAAA	0.666637	0.0372796
GAGGC	0.665505	0.0203709
GGGAA	0.663972	0.0312755
GAGGA	0.663361	0.024162
GCGGT	0.662925	0.0248223
TGGGA	0.662588	0.0225914
GGCTT	0.662559	0.0237989
GGGCC	0.662125	0.0236951
GGCCG	0.661704	0.0242405
CGAGG	0.660906	0.0295359
GCAGG	0.659796	0.0207477
GGCGA	0.659326	0.0363322
GTGAG	0.657295	0.0312846
GGCTG	0.655971	0.0154114
AGGCG	0.65343	0.0267263
GGTGT	0.653071	0.0287079
CGGCG	0.651391	0.0402666
GGGTA	0.650771	0.0315175
AGGAG	0.650211	0.0267532
GGGCT	0.650195	0.028234
CGGTC	0.64956	0.0198481
CGGTG	0.649376	0.0233913
GGGCA	0.649318	0.0170334
GGTTC	0.64891	0.0239736
GGCGT	0.64885	0.0215637
GGTAG	0.647306	0.0260807
GGCAG	0.647053	0.025139
CGGGT	0.646416	0.0264022
GGTAA	0.645096	0.0271219
GCGAG	0.643913	0.0248092
CGGGC	0.641784	0.0242374
GAGGG	0.638341	0.0195815
TGGGG	0.638218	0.0270071
GGGTT	0.637178	0.0266845
GCGGC	0.633829	0.023456
GGTCG	0.631224	0.0186768
GGGAC	0.62835	0.0281955
GGGTC	0.626849	0.0264758
GGTGG	0.620683	0.0319868
GGTTG	0.616523	0.0239286
GGGCG	0.615251	0.0244439
AGGGG	0.614816	0.0314857
GCGGG	0.610625	0.0248985
GGGTG	0.606389	0.0238605
GGAAG	0.604193	0.0272013
GGGGA	0.59992	0.0222463
GGGGG	0.590825	0.0157316
CGGGG	0.584842	0.0224247
GGGAG	0.583758	0.0264375
GGGGT	0.581645	0.0192712
GTGGG	0.577568	0.0252241
GGCGG	0.565632	0.0213848
GGGGC	0.549874	0.0300682

## Sheet: dsDNA
	Normalized fluorescein intensity	SEM
CTACG	1	0.126711
CTTGT	0.968865	0.0729467
CCTCT	0.950877	0.219497
CCGTG	0.939494	0.0719051
CTCTT	0.932868	0.0477635
CCTTT	0.931907	0.124297
CTTCT	0.929484	0.205472
CTATT	0.922981	0.0749693
CTGCT	0.922454	0.0687154
CGTTT	0.920668	0.0598993
TCTCT	0.916247	0.0479091
TTCAT	0.914805	0.0877915
CCTTG	0.91457	0.0497917
CCTAT	0.913567	0.0584965
TATAT	0.912879	0.07136
CTTAT	0.910499	0.103073
CATCT	0.904906	0.0436658
CTGTT	0.902425	0.0633982
TTATT	0.901379	0.151966
CTAAT	0.899441	0.0736871
CTTTT	0.897854	0.198766
CGGCT	0.897772	0.0529599
CTCCT	0.896993	0.0811938
CATAT	0.894953	0.0993288
CTAGT	0.8939	0.0909398
CGTAT	0.889359	0.0699425
CTCTC	0.888355	0.484259
CTTTG	0.887605	0.080423
CTTGC	0.887364	0.195831
CAGTG	0.88705	0.131877
AGTTA	0.886061	0.0791322
TTTCT	0.884678	0.0631779
CTACT	0.882634	0.0405789
TACTT	0.881936	0.0790902
TTGTT	0.87964	0.0798977
CACGT	0.879423	0.0632389
TTCTT	0.878397	0.141191
ACGTT	0.878087	0.14942
CTTCA	0.876603	0.0829859
CATTT	0.875871	0.0662337
CTAGC	0.875746	0.158412
CAGTA	0.875296	0.207085
AGCGG	0.874197	0.0625803
CTGAT	0.873284	0.0861623
CTCTA	0.872864	0.0526925
TTGCT	0.871893	0.0690153
CCGTT	0.871851	0.0532117
CACTT	0.871823	0.183636
TGTGT	0.870997	0.0392556
TTCCT	0.869003	0.0501835
TTAGT	0.868313	0.0719705
CTGGT	0.864899	0.0839317
ATCTA	0.864553	0.0517946
CTGCG	0.863866	0.051979
CTCTG	0.863811	0.221502
TGTCA	0.863715	0.0518062
CTGTC	0.862797	0.149712
CGTAG	0.861371	0.141477
ACTAA	0.860675	0.0907707
ATATA	0.860512	0.0946011
CAGTT	0.860368	0.097648
CCATT	0.860108	0.0635012
CATTG	0.859414	0.0499036
TCTAT	0.858538	0.112756
ATTAA	0.858166	0.0860563
ATGGT	0.855695	0.155933
CGGTG	0.855003	0.0539098
TATTT	0.85494	0.100529
TAGGT	0.854698	0.112222
TGTAT	0.853852	0.0983343
CATGT	0.85345	0.118561
CGACT	0.851715	0.125672
TAACT	0.851199	0.13963
CCTAC	0.847474	0.0370264
CCCTT	0.847307	0.084924
ACTCA	0.84726	0.0491716
CTCGT	0.846934	0.0230767
CCTGT	0.846377	0.182967
TTACT	0.844968	0.0748925
TATCA	0.844765	0.0761482
CTTAG	0.844595	0.0900649
CACTG	0.844281	0.0876644
CTCGC	0.844115	0.0304437
TTAGC	0.843866	0.151922
CTAGA	0.843683	0.089036
CACAT	0.842877	0.239465
ATAGA	0.842708	0.0707984
CTGTG	0.842703	0.149624
TACTG	0.841997	0.0517201
CAGTC	0.840965	0.0781282
CTAAC	0.840256	0.0908472
TTCTA	0.838973	0.0662583
ATGCA	0.837788	0.0871197
CCTTC	0.83753	0.0858154
CAAAC	0.837359	0.0965415
TAGCT	0.837347	0.0637204
TACCT	0.836617	0.142102
CACCT	0.836541	0.179309
CCCTG	0.835198	0.0686574
CGCTT	0.835149	0.0469797
CTTTC	0.834886	0.0675575
ATAAA	0.834872	0.0759452
CTCGG	0.834464	0.0948059
TCCTT	0.83436	0.0681175
TTCAC	0.833712	0.243449
AGCCA	0.833437	0.0469244
CTACA	0.833288	0.0828026
CAGAG	0.833281	0.11549
CATTC	0.832532	0.0924555
CTCCC	0.8319	0.0970712
CGCTA	0.831891	0.083877
CATAG	0.830854	0.0823927
CATCA	0.830512	0.080369
CTGAG	0.830481	0.108849
TATCT	0.830262	0.178084
TGATT	0.830093	0.0348319
CTTCG	0.829995	0.0924
AGCAA	0.828817	0.0339046
CGATT	0.828402	0.0693777
CTGGC	0.828371	0.0895615
CGCAT	0.828314	0.0469773
CTTCC	0.828169	0.111734
CGTGT	0.827938	0.0515415
TTTGT	0.827612	0.10179
TATCG	0.826988	0.130121
TCACT	0.826951	0.0504747
CAACG	0.826794	0.081829
AATGA	0.826739	0.100654
ATCAA	0.826181	0.0592124
CATTA	0.825744	0.0600711
CTCAT	0.825229	0.100898
CTTAC	0.825087	0.0781648
CCAGT	0.824997	0.0546155
CAATT	0.824985	0.0670605
ATGGG	0.824928	0.0925476
ATTGC	0.824873	0.0948644
ATGAA	0.823738	0.0550161
CCTAG	0.82345	0.0853438
CCTGC	0.823429	0.198696
AGCTA	0.823347	0.072072
CAGCT	0.822577	0.130299
CGTCG	0.822399	0.0697115
ATTCA	0.820853	0.0667886
ATAAC	0.820661	0.0723041
TCATT	0.820629	0.0711413
TAGCC	0.820497	0.0556546
TATAG	0.820447	0.140966
ACTGG	0.820266	0.0825133
GTACT	0.820087	0.168261
CAGGC	0.820078	0.125441
AGTGT	0.81982	0.110882
CTACC	0.819284	0.0664583
TAAGT	0.818833	0.0615658
TTCAG	0.818512	0.109481
AAGGC	0.817982	0.0582673
CCGTC	0.817668	0.0915674
ATAGC	0.817657	0.109571
ACGTA	0.816903	0.0568081
CTAGG	0.816752	0.0806823
TGGTT	0.816191	0.104127
TTTTT	0.816147	0.188895
CGTTG	0.816049	0.0526478
TAGCG	0.8152	0.068968
CCTTA	0.81481	0.0858985
TCAGT	0.814647	0.161305
CCTCG	0.813643	0.0755357
ACTAC	0.813167	0.072344
TATGT	0.812454	0.0663281
CCATC	0.811884	0.0695922
TGTTT	0.81187	0.0705458
CGTCT	0.811813	0.176941
TAATT	0.811456	0.158766
CGGTT	0.81115	0.088695
TTTAC	0.810981	0.149164
TCAAG	0.810977	0.0941091
CCCCT	0.810814	0.0823707
AGTCC	0.810438	0.135014
TGTCT	0.809877	0.0998632
CATCG	0.809545	0.201221
CAAGA	0.80948	0.0576427
ACTGC	0.809237	0.0612617
ACTCT	0.809037	0.0554276
TTATC	0.808628	0.0668018
TTTAT	0.808514	0.0411909
TTCTC	0.807725	0.0792678
AGCGA	0.807459	0.0984633
ATCAC	0.807014	0.26034
CCCAT	0.806485	0.314388
TACGT	0.805825	0.113235
CACTA	0.805746	0.0977041
CCGCT	0.805102	0.0754964
TTACA	0.804947	0.0799919
ACAGG	0.804834	0.143788
AGTGC	0.804751	0.0431026
ATCGT	0.80464	0.0936509
ACCTA	0.804623	0.162589
CGCGT	0.804104	0.0396015
AATGT	0.803889	0.0544088
TGTCG	0.803565	0.0623999
CACGC	0.803359	0.082143
CAAGC	0.80324	0.0780172
ATCCC	0.80289	0.22183
TTCGT	0.802795	0.0955058
AATTA	0.802336	0.0638334
TACAG	0.802301	0.435893
AATAC	0.801981	0.0671659
ACGTG	0.801931	0.0638921
TTAAT	0.801588	0.100202
CTCAC	0.801037	0.113531
ATCGA	0.800543	0.0400075
CAAGG	0.800229	0.0579295
TTGTG	0.800115	0.0822504
TACTC	0.800036	0.0729127
AAGCA	0.799966	0.072528
ATAGT	0.79975	0.0653103
CGCCT	0.799709	0.0615161
TTCTG	0.798843	0.0923141
TACCG	0.798701	0.046884
CACTC	0.798527	0.160933
CGTTA	0.798349	0.067385
TATTC	0.798297	0.0748249
TGTAG	0.797794	0.0850258
TGTGA	0.797643	0.0658093
CCTCA	0.797052	0.11833
CTATA	0.796309	0.315311
TCTCG	0.795761	0.0643695
CCCGT	0.795296	0.0461871
CCATA	0.795043	0.155464
TAGTT	0.794923	0.107181
CCCTC	0.794493	0.0748102
ATGGA	0.794416	0.0981468
CCGTA	0.794373	0.0872425
ACTGA	0.794019	0.0616789
TATGC	0.793905	0.0974213
TCTTT	0.793809	0.0895193
TAATG	0.79341	0.254624
CGAAT	0.793092	0.0914908
AACAA	0.792704	0.0488602
CATGC	0.792457	0.0278813
TGAAT	0.792456	0.0631247
ACACA	0.792282	0.0840551
CAGGT	0.792276	0.0710497
CCCTA	0.792038	0.0575936
CATAA	0.791969	0.069838
ACATA	0.791889	0.128661
AGTGA	0.791482	0.062012
ACGGT	0.791306	0.0427184
CCGCG	0.791029	0.0527425
ATCTC	0.790325	0.168674
CATAC	0.789121	0.0759987
ACACC	0.788193	0.06151
TTGAG	0.788188	0.0557113
AGCGC	0.788048	0.067093
ATACA	0.787844	0.0672164
CAGGG	0.787382	0.057062
CCTGG	0.78735	0.0611248
CGAGT	0.787252	0.0591735
TTGAT	0.787211	0.254681
TTGCC	0.787159	0.273075
CTCCG	0.787158	0.2011
TTTTC	0.787055	0.137823
ATACG	0.786384	0.0538596
ATCGC	0.786055	0.0901476
ATCCA	0.785828	0.0617852
TAAAT	0.785712	0.136248
CTCCA	0.785661	0.209589
CTATG	0.785419	0.0474495
ATTCC	0.785332	0.0953364
ATACC	0.784477	0.0612597
AACTA	0.784185	0.0909417
ATTGA	0.784004	0.106317
TCGCT	0.783926	0.091371
TTTAG	0.783701	0.027344
CGAGG	0.783694	0.109155
TTAGA	0.783261	0.0714773
CTTAA	0.782603	0.0834096
CTTTA	0.782505	0.0602666
ACTCC	0.782422	0.183764
ATTGT	0.782392	0.0438344
CCACT	0.782296	0.17841
TGGCT	0.782152	0.0918222
TGACA	0.781683	0.057089
CTGCA	0.781679	0.187944
TGGTG	0.781452	0.054095
GTCTT	0.781149	0.144071
CTCAG	0.781109	0.0670005
CGGAT	0.781074	0.0667979
TTGTA	0.780989	0.0377424
ACGCA	0.780814	0.0812731
AAAGT	0.780678	0.193342
CAATA	0.780615	0.0345762
CTGAC	0.779357	0.0821407
CTGCC	0.779229	0.154574
CTTGG	0.778864	0.0718032
CCTAA	0.778751	0.0515491
CTCGA	0.778718	0.0527166
TTATG	0.778638	0.0765896
CAACC	0.778143	0.0564011
TACAT	0.778142	0.186882
CCAGA	0.778074	0.112634
ATGGC	0.777879	0.049656
ATTAC	0.777744	0.0918325
AACGC	0.776418	0.094062
AGGGC	0.776388	0.0840168
ACCGC	0.775985	0.182658
CAGAA	0.775885	0.0382508
AGCGT	0.775303	0.0615254
GTGAT	0.774001	0.0640293
ACCGT	0.773915	0.0713527
CTATC	0.7735	0.0855913
ATCTG	0.773296	0.10306
TATTA	0.773251	0.0956959
GTAGT	0.772863	0.0567171
CGACG	0.772837	0.0807465
CAGAT	0.772746	0.0859223
TCCTG	0.77261	0.0782242
CCACG	0.772534	0.286538
TAGTA	0.772423	0.0682734
TCTCA	0.77208	0.0882796
ACTTA	0.772065	0.0505548
ATTTA	0.771784	0.139601
CCGAT	0.771276	0.168838
AATCA	0.771172	0.0540287
AAACA	0.770395	0.141565
TCATA	0.770167	0.0852848
CGATG	0.769966	0.152874
GTCAG	0.769875	0.105878
TATTG	0.76984	0.0614449
TCGTT	0.769767	0.0631411
CAGCG	0.769626	0.0864566
TTGGT	0.769447	0.0415972
CGGCG	0.768977	0.164858
CGTGA	0.76869	0.0371041
TCCTA	0.768567	0.101852
TAAGC	0.768553	0.273069
CGTGG	0.768264	0.0486184
TTTCA	0.768238	0.0188237
ACGAC	0.767423	0.098
CGGTA	0.767388	0.0652196
TCTGC	0.767257	0.0621069
AAGAA	0.76704	0.1132
CCGGT	0.767008	0.0465611
TTAAG	0.766889	0.032685
AGACA	0.766861	0.103991
AAGGT	0.766535	0.0848783
GCGTT	0.766345	0.0937717
TACGA	0.76628	0.195724
AGTCT	0.765946	0.0890292
CCCAG	0.765832	0.175633
TCGCC	0.765397	0.113252
AGTAA	0.765264	0.0526397
AGTAC	0.765131	0.0672273
GCTAT	0.764563	0.0544274
TTCCA	0.763409	0.112621
AGTTT	0.763244	0.0574075
CGTGC	0.763093	0.122626
ATGTC	0.763079	0.0742723
TCGTG	0.762616	0.0490956
AATAG	0.76256	0.108632
AAGAC	0.762552	0.0842199
ATGAG	0.76253	0.138685
ATGTT	0.762399	0.0604282
ACAGT	0.76231	0.18357
TTTTG	0.762047	0.187846
GTCGT	0.761993	0.100191
CCTGA	0.761817	0.104149
CGCTG	0.761689	0.0354505
CGTCA	0.761672	0.114096
CACAG	0.761486	0.186208
AGGCA	0.761183	0.0905774
AGGTG	0.761085	0.0458131
ATGAC	0.761071	0.10528
TTGCA	0.761032	0.134132
TATCC	0.760283	0.624113
CTCAA	0.760206	0.0585482
ATTGG	0.760114	0.0956984
TCTTG	0.759988	0.0375603
GTGTT	0.759786	0.0421533
ATAGG	0.759763	0.0616338
AAAGA	0.759379	0.0876679
TTTCG	0.759254	0.406081
CATGG	0.75907	0.0703849
AGGGT	0.758903	0.0337329
ATACT	0.758733	0.274685
TCTGT	0.758404	0.0585282
GTTAT	0.758186	0.0869076
AGAGA	0.758109	0.105298
ACGAA	0.757971	0.0753484
TGTTC	0.757919	0.0778404
GCTTT	0.757661	0.03818
ATTAT	0.757545	0.070465
ATGTA	0.757259	0.0621954
AGAGC	0.756692	0.346172
TAGTG	0.756643	0.0696146
TGCCT	0.756636	0.0902286
TAAAG	0.75608	0.0660635
GTGCT	0.756073	0.130517
TTTTA	0.756069	0.0548645
CCTCC	0.756056	0.0924757
TAGAT	0.756027	0.0767684
TCAGC	0.755933	0.232901
AAGAT	0.755758	0.0798631
AAGTA	0.755721	0.0588655
TTATA	0.755101	0.0899712
CAGCA	0.755016	0.0584397
AACGT	0.754912	0.0650756
TTCAA	0.754615	0.100409
ACCAA	0.754563	0.0944796
CGCCG	0.754231	0.166243
TTGAC	0.754166	0.231206
TAATA	0.754011	0.074363
CACAC	0.753641	0.0678489
ACTCG	0.753483	0.0870996
TCTAG	0.753404	0.0996575
TTACG	0.753316	0.160008
CTAAG	0.7533	0.240919
CTGTA	0.753218	0.0416532
CGTTC	0.753174	0.220828
ACCGA	0.75292	0.0533801
AAGCC	0.75237	0.0495172
CCAGC	0.75214	0.0575401
CTGGG	0.751957	0.0595804
CAGCC	0.751765	0.0587763
GTCCT	0.751748	0.0950369
TCTAC	0.751154	0.0714427
TTGAA	0.751142	0.0861195
TTCGC	0.750617	0.136542
TCTTA	0.750571	0.0793304
GATGT	0.750292	0.0621097
AGATC	0.750264	0.120065
CGATA	0.750063	0.169259
TATAC	0.749902	0.0748202
ACACT	0.749782	0.222093
GGCTT	0.749665	0.0449805
ATGCG	0.749562	0.0894577
GGTGT	0.749104	0.122312
ACACG	0.748786	0.0683986
CCACA	0.748751	0.0634479
CACCG	0.748594	0.232113
GCTAC	0.747698	0.0734128
GAGTG	0.74762	0.0803149
AAGTT	0.747328	0.0510983
ACAGC	0.747095	0.0632946
AGTGG	0.747032	0.144208
CCCGG	0.746867	0.171637
CCAAG	0.746487	0.0537561
GTCTG	0.746474	0.0735774
ATATG	0.746402	0.134596
TGTGC	0.746366	0.128235
TGTAC	0.745663	0.059146
TAACA	0.745577	0.0891189
CAAGT	0.745528	0.122027
TGGTA	0.745504	0.0870644
TCCAT	0.745293	0.127481
TACAC	0.745016	0.111882
GTACA	0.744958	0.0697444
CGGAG	0.74487	0.0632484
GTATG	0.744866	0.0448324
TGCTT	0.744522	0.0577596
ATGTG	0.744063	0.0367416
AATCT	0.743814	0.118304
ATGCC	0.743517	0.0464258
AGAGT	0.742877	0.101486
TTGTC	0.742548	0.0849734
GCTGT	0.742454	0.065605
AGATT	0.742351	0.0636654
TCATG	0.742333	0.155595
TGCTC	0.742261	0.192981
CAAAA	0.741856	0.0551668
TTTGG	0.741557	0.0703021
GTTCT	0.740861	0.0329503
ACCAT	0.740854	0.0765817
CCGGC	0.740692	0.0556904
TCTGG	0.74066	0.166907
TGCCA	0.740559	0.0753419
TGACT	0.740448	0.0591974
CCATG	0.740261	0.0842188
AGCCG	0.740021	0.152143
TACTA	0.739753	0.108825
TAAGA	0.739473	0.234096
AATGC	0.739217	0.0806901
AACGA	0.738336	0.074388
ACTGT	0.737947	0.0675797
TCAGG	0.737248	0.057404
ATATT	0.737173	0.0930556
ATCCT	0.737029	0.0853756
CACAA	0.736889	0.0989881
TGATC	0.736697	0.10376
TGTTG	0.736457	0.0778147
TATGA	0.736362	0.0925628
TTAAC	0.735963	0.0363065
ATGCT	0.735907	0.0799698
GTCTC	0.735466	0.0517679
TACCA	0.735444	0.0798057
ATTCG	0.734932	0.14872
TCCAG	0.734266	0.0324984
TTTGC	0.734226	0.150811
CTAAA	0.734149	0.0670362
TGGGT	0.733935	0.230206
AGGTT	0.733699	0.0960499
AGGAA	0.733693	0.0739915
TGATA	0.733615	0.121869
GGCCT	0.733573	0.0744899
AACGG	0.733467	0.0510242
CGCAC	0.733427	0.257087
CCCCG	0.733115	0.0869286
GTTGT	0.732651	0.276364
TTGCG	0.732539	0.0648234
ATCGG	0.732374	0.0573357
ATGAT	0.732346	0.110862
TCGAG	0.732107	0.0700141
CCGGG	0.731992	0.160741
ACTAT	0.731793	0.0298901
GTTTT	0.731192	0.0660523
AATAA	0.731167	0.0772553
TACGG	0.730876	0.066505
ATCCG	0.730872	0.0799549
GGTAT	0.73083	0.0505554
GTGGT	0.73071	0.025098
AGATA	0.730158	0.0650052
ATATC	0.729926	0.0747795
AATCC	0.729911	0.176668
TATGG	0.729754	0.0990061
TGGAT	0.729743	0.040908
CCAAC	0.729311	0.0888393
TCACC	0.729116	0.102914
TCTGA	0.72889	0.0562665
ATCTT	0.728694	0.0948229
GGTCT	0.728314	0.0483598
AGCCC	0.728194	0.056845
ACTAG	0.728108	0.252158
AATCG	0.728082	0.0727332
TGAAG	0.728041	0.0539305
TTAGG	0.727815	0.0633287
ACAAA	0.727605	0.26091
CCGCA	0.727428	0.108576
TCTTC	0.727321	0.106136
TCTCC	0.727311	0.035962
ACATT	0.726983	0.0871881
CCCGC	0.726896	0.0555938
TCGTC	0.726342	0.077381
CGCGG	0.726332	0.0484714
ACTTC	0.726325	0.0810633
ACGGC	0.726289	0.347984
AGGTC	0.726202	0.103715
AGTTC	0.72604	0.0953821
GTGTA	0.725838	0.053374
CATCC	0.725646	0.116211
TAGCA	0.725421	0.0312022
TCATC	0.725126	0.064598
TGTTA	0.725098	0.0348472
AGATG	0.724724	0.191469
CGTAC	0.724704	0.121819
TAAAC	0.724659	0.280968
TGCTG	0.7246	0.067994
AGTCA	0.723695	0.0747841
GAGTT	0.723651	0.103548
CGTCC	0.723623	0.140646
GAACT	0.723393	0.0693856
GTTTG	0.723187	0.0911209
TAGGG	0.722912	0.0681998
CTGGA	0.722818	0.0806178
TCGGT	0.722579	0.0807247
TATAA	0.722554	0.119346
CTTGA	0.722371	0.149888
TCACA	0.722264	0.106857
GACTT	0.721869	0.0753845
AACTT	0.721288	0.0725881
AGCTC	0.721227	0.162779
CGCTC	0.721136	0.184106
CAATG	0.720691	0.0712056
TACGC	0.720616	0.134699
CTGAA	0.720539	0.194711
AAGGG	0.720414	0.074741
GTAAT	0.719949	0.0265571
TTTCC	0.719857	0.0497967
AGGTA	0.719181	0.1233
TACAA	0.71883	0.079032
GTATT	0.718769	0.108117
TGTAA	0.718616	0.0600425
AGGAC	0.718608	0.0725271
TAGAC	0.717802	0.0708985
TTCGA	0.717625	0.226765
TTCCG	0.717608	0.242978
CCAAT	0.717209	0.21602
AGAGG	0.716928	0.0431273
TCGCG	0.716844	0.0532331
CCCGA	0.716589	0.0723621
AGCAT	0.716422	0.0905328
AGTCG	0.716413	0.139536
GAGTC	0.716051	0.068154
TGATG	0.715582	0.0760214
AAACG	0.715432	0.0626391
ACTTT	0.714943	0.063295
ACGGG	0.714716	0.0809357
TAAGG	0.714677	0.0959086
ACGCC	0.714497	0.0582099
CGCGC	0.714417	0.051772
TAGGC	0.71435	0.0368787
AACCT	0.713988	0.143554
TCGCA	0.713987	0.148239
ATAAT	0.713871	0.0805295
AATAT	0.713493	0.0636245
TGGAA	0.713334	0.0746886
TGGCA	0.713311	0.0735989
ATTCT	0.712962	0.0559728
TAGTC	0.712948	0.0996527
ACGAT	0.712679	0.0864214
GATCT	0.712523	0.0816276
GTCAT	0.712496	0.0407027
TGTGG	0.712396	0.143807
AATTT	0.71187	0.0710047
TGCCG	0.711834	0.109388
TCCGA	0.711767	0.0730205
TTGGA	0.711414	0.0964688
TCAAT	0.711031	0.0923084
TAGAG	0.71095	0.10841
ATTTC	0.710746	0.155028
GTTAG	0.710564	0.0639871
CAAAT	0.710375	0.114347
TCTAA	0.71021	0.0711803
CGAAG	0.709824	0.0440962
ACAAC	0.709711	0.0804667
AGGGA	0.709437	0.0962358
GCTTC	0.709428	0.0430259
TAGAA	0.709351	0.0915484
TTGGG	0.709274	0.0891033
TCAGA	0.708489	0.0688516
AGACC	0.708348	0.0601782
CGGCA	0.708198	0.097963
TGTCC	0.708082	0.0528921
TGCGA	0.708075	0.108089
ACCGG	0.708064	0.0905331
TCCGT	0.706946	0.0748842
ACAAT	0.706249	0.0694955
TTACC	0.706116	0.100804
CCACC	0.705993	0.0619916
CGATC	0.705984	0.0498946
CGAGC	0.705877	0.0630237
AATTC	0.705219	0.0935262
CATGA	0.704804	0.0639131
GCTAG	0.704132	0.0665892
ACGTC	0.703036	0.0693965
GACCT	0.70296	0.132091
CGGGT	0.702542	0.0748615
AAGGA	0.702397	0.0713351
AACCG	0.702245	0.186903
ACCCT	0.702226	0.0890199
TAGGA	0.701874	0.120336
TTAAA	0.701715	0.0828143
TCGAT	0.701416	0.0680404
CGGGG	0.700799	0.0838692
AGCAC	0.700317	0.101951
ATTAG	0.700098	0.0545283
CGTAA	0.698944	0.0204957
AAATA	0.698803	0.0384838
CAGGA	0.698333	0.0715895
TCACG	0.698208	0.0626919
CGGGA	0.697992	0.127846
TGAGT	0.697864	0.0840749
TTTAA	0.696706	0.0744081
TGCAC	0.696504	0.0724811
GGAGT	0.696486	0.107749
AAGCG	0.69618	0.25169
GTTGC	0.696141	0.124905
AAAAT	0.696056	0.0429546
TAATC	0.695835	0.0580806
CAACT	0.695474	0.0785153
CGACA	0.695183	0.132969
AGGGG	0.694884	0.114617
TTCGG	0.694198	0.0874556
TGCAT	0.693819	0.0976324
AGTAG	0.693795	0.0636057
ATCAG	0.693602	0.0811158
GATAG	0.693075	0.0683398
CGCAA	0.69289	0.0881597
AGAAC	0.692731	0.0339976
CCGAG	0.691773	0.0768456
AGACT	0.691616	0.128526
AAGCT	0.690485	0.0583057
GATAT	0.690351	0.123175
ACAGA	0.690293	0.16388
GCCTG	0.689795	0.102873
CACGA	0.688223	0.0836297
GTTAA	0.688061	0.059698
GGTAG	0.68797	0.0602376
CAACA	0.687612	0.178207
AAAGC	0.687149	0.0434346
AATGG	0.687126	0.122864
AACCA	0.687108	0.0887168
GATTA	0.687016	0.131646
GTATC	0.686875	0.0669309
GCGTG	0.686508	0.0496427
CCGAC	0.686491	0.0638339
CCGAA	0.686365	0.0780401
GGCGT	0.686246	0.0390679
ATTTT	0.686097	0.0608455
GTTTA	0.685912	0.172012
TCCGC	0.685757	0.083139
AGAAA	0.685664	0.129846
TTTGA	0.685558	0.0481952
CAATC	0.685465	0.147468
AAATT	0.685268	0.0435314
CACGG	0.684161	0.0652262
ACCTT	0.684119	0.0750216
CGAGA	0.683965	0.0502429
AACCC	0.683836	0.18057
CAAAG	0.6838	0.0577041
GAGCT	0.683275	0.0705664
CGCGA	0.683186	0.118368
GATCG	0.683121	0.0665875
GTAGC	0.682354	0.0756596
GAGTA	0.681599	0.0585896
TGAAA	0.681467	0.0717578
GTATA	0.681232	0.116269
TGACG	0.68095	0.0879322
GCTAA	0.680065	0.0700292
TGGGC	0.680047	0.0466472
GGGTG	0.67933	0.0815789
CCAGG	0.679259	0.0912175
CGCCA	0.679066	0.105764
ACCTC	0.678995	0.078204
GGCGC	0.678989	0.14981
CCAAA	0.67884	0.220707
TGGCC	0.678699	0.0596424
GTGTG	0.678628	0.131887
TCCCT	0.677937	0.130727
TGGCG	0.677675	0.0559534
GGCAT	0.677041	0.104473
CGAAC	0.676687	0.111462
GCTGA	0.676665	0.0532986
TGCGT	0.676191	0.0424422
AGCCT	0.676094	0.106326
AAAAA	0.676024	0.0893169
TCAAC	0.675979	0.0640688
TCAAA	0.675954	0.0497424
TTGGC	0.675826	0.140195
AAAGG	0.675609	0.0493768
GCATC	0.675585	0.0861987
GCCTT	0.675559	0.190031
TCCTC	0.674632	0.0638162
GACGT	0.674504	0.0367767
GAGAT	0.673906	0.0628054
ACCAC	0.673883	0.0672086
TGAGC	0.673706	0.136665
CGCAG	0.673407	0.0519488
GACTA	0.673249	0.0430062
AATTG	0.673242	0.044123
TTCCC	0.673136	0.0937816
GGTTT	0.672506	0.102738
TGAGA	0.672463	0.0619762
GCATG	0.671764	0.0960989
TCCAC	0.671141	0.061813
GTGCA	0.67072	0.0762405
TGCAG	0.670467	0.0577411
GGTTA	0.670312	0.0719426
AAGTC	0.669905	0.0765756
GTGTC	0.669525	0.0967476
GTTTC	0.669025	0.0747039
GCTCA	0.668778	0.0618197
ACAAG	0.668707	0.052694
GCCCT	0.668691	0.0849902
GCGCT	0.668625	0.175817
AGGCC	0.668426	0.0725626
TGCGC	0.668239	0.0616545
AAACT	0.668174	0.0964276
GTTAC	0.668153	0.0661085
ACCCA	0.667813	0.185092
TCGAA	0.666903	0.160881
GCATT	0.666884	0.0947499
GCCAT	0.666187	0.0517088
GACTC	0.665666	0.055839
GAGCG	0.665517	0.0895572
TGGTC	0.665329	0.0738462
TGGAG	0.66523	0.102857
GTTCA	0.664796	0.0411656
GATGC	0.66479	0.0803439
GTCGC	0.664449	0.13975
TAACG	0.664427	0.0811436
CGAAA	0.664394	0.0538963
GCACG	0.664061	0.0592291
AACAC	0.664016	0.0530468
TGCCC	0.663758	0.056743
AGTTG	0.663337	0.0839436
GCACT	0.663248	0.0617446
AAATC	0.663156	0.151312
TGGAC	0.6625	0.105911
AGAAT	0.662239	0.206095
ATTTG	0.661802	0.0524243
GGCTC	0.661666	0.0720975
TCGGC	0.660998	0.0500147
GGCTA	0.660542	0.0721881
CACCA	0.660392	0.0677988
AAAAC	0.660313	0.0853466
GGTTG	0.659809	0.0924825
GAAAG	0.659616	0.0617551
ATCAT	0.659604	0.0904329
GAATT	0.659362	0.0619936
TGGGA	0.65924	0.0833241
AGTAT	0.659126	0.0545547
ACGCT	0.659023	0.0793005
TAACC	0.658801	0.0940669
GTGCG	0.658571	0.0584508
TCGGA	0.65762	0.087234
GCTTG	0.657463	0.0595024
GGGTT	0.657397	0.111575
TGCGG	0.657395	0.0789865
AAGTG	0.657317	0.115331
TGAGG	0.657252	0.0591933
GCTCG	0.656917	0.0730126
AGCTT	0.656322	0.135017
CCCAC	0.656287	0.0662274
GCTGC	0.656203	0.138367
CAGAC	0.65586	0.0594377
GGTCG	0.655225	0.0457532
GACTG	0.655068	0.0576635
GACAT	0.65498	0.0642212
GACGC	0.654909	0.0735679
TCGTA	0.653497	0.219539
AGGAT	0.653471	0.0519197
GGACT	0.653461	0.07375
GAGGT	0.653292	0.0240987
GCTGG	0.653107	0.0538333
TCCCA	0.652485	0.245317
CCCCC	0.652484	0.0862531
GATAA	0.652261	0.138666
GGATT	0.651886	0.130492
GGTGC	0.651557	0.092951
GATCA	0.651495	0.050794
GAAGT	0.651143	0.0576503
ACGGA	0.649691	0.0937996
TCGAC	0.649367	0.208522
GTCCG	0.648507	0.0637551
AAGAG	0.648425	0.141284
GATTC	0.648386	0.129624
TGCTA	0.647979	0.0494526
GCGAT	0.647931	0.0882567
ATAAG	0.64681	0.0650942
TCCGG	0.646643	0.0792049
GATTG	0.646612	0.0590476
GGAAG	0.646428	0.104097
GATTT	0.646334	0.0690657
ACGCG	0.645913	0.0718866
GCAGT	0.645798	0.0402435
GCGCA	0.645448	0.0637657
ACATG	0.644972	0.0420905
GGGCT	0.64492	0.0983525
CACCC	0.644902	0.0650208
GGCAG	0.644122	0.0892317
CGGTC	0.642414	0.0914153
GCCTC	0.642264	0.0709881
GAATA	0.641781	0.0767639
GCTCT	0.641739	0.0612329
AAACC	0.641111	0.0650792
CGGCC	0.641069	0.0554554
GATGA	0.641024	0.176234
GCGGT	0.640891	0.0995473
AGGAG	0.64051	0.125018
GTGAG	0.640498	0.0746484
AGACG	0.640332	0.0500349
GTGCC	0.640282	0.127369
GCATA	0.640038	0.0567185
GTCAC	0.639967	0.136541
GTCAA	0.639659	0.089365
ACCCG	0.639207	0.089845
CGGGC	0.637553	0.0645477
AACTC	0.637326	0.0654089
GTGAA	0.637227	0.0791304
GTAAG	0.637208	0.0677701
TGGGG	0.637058	0.0872738
TGACC	0.636216	0.106942
ACATC	0.636071	0.0457641
GTTGG	0.635336	0.075971
AGGCT	0.634763	0.0385043
GCCGT	0.634538	0.0550711
CCCAA	0.633094	0.153336
TAAAA	0.633041	0.0732054
AGCTG	0.63209	0.062327
GTACG	0.631857	0.059544
AAATG	0.631584	0.0653938
GTTCC	0.63137	0.155996
GTGAC	0.631342	0.0528646
GTAAA	0.631183	0.0869575
GAGCA	0.630929	0.102616
CGGAA	0.630146	0.0587344
CCCCA	0.629972	0.0682216
GATGG	0.629955	0.0932012
GCAAG	0.629812	0.0641736
GTCGA	0.629564	0.073161
GGCTG	0.629317	0.0615624
GTAGA	0.629144	0.073633
GGGAT	0.629074	0.178514
GACAG	0.627891	0.0323896
GGCAC	0.627869	0.0502855
CCGGA	0.627626	0.0824139
GCTCC	0.627505	0.0684379
TCGGG	0.627348	0.0790842
GATAC	0.625888	0.114011
GGTTC	0.625236	0.0531955
CGACC	0.62502	0.0489639
GTCTA	0.624553	0.231184
TCCAA	0.623896	0.107835
GGAGA	0.622894	0.032842
GAGAG	0.620902	0.064269
CGCCC	0.620812	0.0705351
AACTG	0.620739	0.156574
GCAGA	0.62059	0.556943
TCCCG	0.620588	0.058126
GTACC	0.619979	0.0766784
GTCCA	0.618799	0.0813981
GCTTA	0.617391	0.0885535
GCGTA	0.615686	0.112603
TCCCC	0.614064	0.102258
AGGCG	0.614003	0.0687165
TGAAC	0.613708	0.0621195
GGATA	0.613448	0.105844
CCGCC	0.613426	0.103781
GCCTA	0.612837	0.0620913
GGATG	0.612224	0.0593364
AACAT	0.611158	0.0401393
GCGAA	0.609932	0.0861965
GAGAC	0.609106	0.0427845
GGTGG	0.609033	0.0944443
GTCCC	0.607972	0.135737
GAACA	0.607516	0.244687
GTGGG	0.60751	0.0648457
GCAAT	0.60723	0.0533365
GTCGG	0.606787	0.0551128
GACAC	0.606731	0.126938
ACCCC	0.60644	0.0502492
ACTTG	0.606433	0.0592002
GCGTC	0.605743	0.0807312
GGAGC	0.605257	0.0522621
GAAGC	0.604127	0.0565017
AGAAG	0.603917	0.0830904
GCCAA	0.60382	0.0460819
GTTCG	0.603176	0.121531
GCGCG	0.602658	0.0556514
GACCA	0.59926	0.11368
ACCAG	0.598598	0.0804719
GGGTC	0.598429	0.0629932
AACAG	0.598285	0.0782047
GCACC	0.597479	0.178891
GTAGG	0.597351	0.0655243
ACGAG	0.596854	0.0974925
GAATG	0.596712	0.0615912
GTTGA	0.596467	0.0872979
GCGAC	0.596334	0.150997
GCACA	0.596274	0.0952899
TACCC	0.596005	0.105448
GGGCG	0.595814	0.082037
GGATC	0.595593	0.0473916
CGGAC	0.594764	0.0659467
GAATC	0.594224	0.0743892
ACCTG	0.59344	0.0755647
GGCCA	0.593077	0.102089
GCGAG	0.591604	0.083979
AGCAG	0.591342	0.0686874
TGCAA	0.589303	0.0800079
GGTCA	0.587643	0.0815768
GGAGG	0.587052	0.110399
GTAAC	0.586474	0.121579
GAGCC	0.585801	0.131768
GGTAC	0.585373	0.102395
GGTAA	0.583872	0.0787167
GGGAG	0.583469	0.0675851
GCCGC	0.583454	0.080592
GAAGG	0.583385	0.074119
GGTGA	0.582689	0.100413
GGGTA	0.582146	0.0966347
GAGGC	0.581713	0.0665699
GATCC	0.57987	0.138734
GTGGC	0.579583	0.0579204
GAAAT	0.579405	0.0614131
GCGCC	0.578565	0.0478886
GTGGA	0.577021	0.0660534
GGGGT	0.572895	0.0330864
GGCAA	0.571455	0.0559857
GACAA	0.569428	0.0790074
GAGAA	0.569354	0.0643587
GGACA	0.568691	0.114321
GCCGG	0.567276	0.075649
GGGCA	0.566155	0.0705162
GAGGA	0.564055	0.128316
GGCGG	0.562728	0.0604658
GCCAC	0.562333	0.0795416
GCCAG	0.561972	0.0470108
GGACG	0.561909	0.161338
GCAGG	0.561342	0.0829223
GAACG	0.560973	0.0890409
GACCG	0.560147	0.0960561
GGCCG	0.558704	0.0744949
GAGGG	0.558495	0.0824182
GCAGC	0.558352	0.184518
GGTCC	0.555557	0.0907102
GGACC	0.554015	0.0732401
GCGGC	0.554005	0.0842193
GGAAT	0.552018	0.0845171
GAAGA	0.547946	0.123451
GACGG	0.546518	0.0673158
GGGGA	0.545849	0.0622411
GCAAA	0.545635	0.13619
GGGAC	0.545378	0.106911
GACGA	0.543986	0.0552438
GGCGA	0.543101	0.19622
GCCGA	0.53933	0.0460275
AAAAG	0.535496	0.0742432
GCCCA	0.532218	0.105709
GCAAC	0.531674	0.0724782
GCGGA	0.527911	0.0816907
GAAAC	0.527255	0.0633519
GCCCG	0.526612	0.0559033
GAACC	0.522294	0.200494
GGGGG	0.516376	0.0534606
GACCC	0.515376	0.0685418
GGGGC	0.509148	0.0988241
GGAAC	0.508987	0.0980143
GCGGG	0.505413	0.0798897
GGCCC	0.500319	0.119376
GCCCC	0.500065	0.0877806
GGAAA	0.496878	0.139089
GAAAA	0.490429	0.215511
GGGAA	0.489228	0.0999897
GGGCC	0.476396	0.0624529
